# Supplementary material for: Lightening flavin by amination for fluorescent sensing
Source: Royal Society of Chemistry journal article supplement (doi:10.1039/d4cp01525h), 2024-01-01
Supplement: d4cp01525h1.pdf [file d4cp01525h1.pdf]

## Supporting Information for:

# Lightening Flavin by Amination for Fluorescent Sensing

Huimin Guo<sup>1\*</sup>, Siyu Liu<sup>1</sup>, Xin Liu<sup>1\*</sup> and Lijun Zhang<sup>2</sup>

<sup>1</sup>School of Chemistry, Dalian University of Technology, No. 2, Linggong Road,  
Dalian, 116024, P. R. China.

<sup>2</sup>Department of Ophthalmology, The Third People's Hospital of Dalian and Faculty of  
Medicine, Dalian University of Technology, No.2, Linggong Road, Dalian, 116024,  
P. R. China.

### KEYWORDS:

Flavin; Fluorescent Emission; Intersystem Crossing; Photocatalysis; Isoalloxazine;

---

\* Corresponding authors, email: [guohm@dlut.edu.cn](mailto:guohm@dlut.edu.cn) (H.G.) and [xliu@dlut.edu.cn](mailto:xliu@dlut.edu.cn) (X.L.)

## Theoretical Methods

The electronic structure of AmFLs were investigated with extensive DFT and TD-DFT based calculations (Figure 1). Methyl was used to represent the alkyl moieties. The ground state ( $S_0$ ) electronic structure of AmFLs were investigated at CAM-B3LYP/6-311G(d) level of theory.<sup>1-4</sup> Polarizable Continuum Model (PCM) was used to handle the impact of dichloromethane (DCM) solvent unless specified.<sup>5-7</sup> The electronic structures of excited AmFLs were investigated with TD-DFT based calculations at CAM-B3LYP/6-311G(d) level with Gaussian 16.<sup>8</sup> CAM-B3LYP function was selected as it can finely reproduce the ground state and excited state structures of heterocyclic and aromatic compounds obtained with second order coupled cluster method.<sup>9</sup> Similar combination of function and basis sets were used to interpret photophysical properties of FLs.<sup>10-12</sup> Frequency calculations were performed for all reported structures to insure there is no imaginary frequencies and to obtain data for vibronic coupling analysis.

The transition dipole moments from  $T_1$  to  $S_0$  are evaluated from the quadratic response function<sup>13-15</sup> and the spin-orbit coupling matrix elements are computed at the same level of theory using the effective single-electron approximation in linear response theory with the Dalton program.<sup>16-18</sup>

The absorption, fluorescence and phosphorescence spectra of compounds, together with the radiative and non-radiative decay rate constants were calculated using MOMAP.<sup>19-24</sup> The absorption and fluorescence spectra were calculated according to eq-S1 and 2:

$$\sigma(\omega)_{abs} = \frac{4\pi^2\omega}{3\hbar c} \times \sum_{v_i, v_f} P_{iv_i}(T) \left| \langle \Theta_{f, v_f} | \mu_{fi} | \Theta_{i, v_i} \rangle \right|^2 \delta(\omega - \omega_{f, v_f, i, v_i}) \quad (\text{eq-S1})$$

$$\sigma(\omega)_{emi} = \frac{4\omega^3}{3\hbar c} \times \sum_{v_i, v_f} P_{iv_i}(T) \left| \langle \Theta_{f, v_f} | \mu_{fi} | \Theta_{i, v_i} \rangle \right|^2 \delta(\omega_{i, v_i, f, v_f} - \omega) \quad (\text{eq-S2})$$

where  $P_{iv_i}(T)$  is the Boltzmann population of the vibrational manifolds in the initial state,  $\mu_{fi} = \langle \Phi_f | \mu | \Phi_i \rangle$  is the electronic transition dipole moment between the initial state  $i$  and final state  $f$  calculated according to the Frank-Condon approximation,  $v_i/v_f$  is vibrational quantum number of state  $i/f$ ,  $\Theta_{f, v_f}$  is the  $v_f$ th vibrational state of final state  $f$ ,  $\omega$  is the radiation frequency and  $\omega_{i, v_i, f, v_f} = \omega_{f, v_f} - \omega_{i, v_i}$ , respectively. The absorption and emission rate constants were calculated as the integration of the spectra.<sup>24-27</sup>

For the non-radiative decay, applying the second-order perturbation approximation, the rate constants were calculated as:

$$k_{f \leftarrow i} = \frac{2\pi}{\hbar} \sum_{v_i, v_f} P_{iv_i} \left| H'_{fv_f, iv_i} + \sum_{n, v_n} \frac{H'_{fv_f, nv_n} H'_{nv_n, iv_i}}{E_{iv_i} - E_{nv_n}} \right|^2 \times \delta(E_{iv_i} - E_{fv_f}) \quad (\text{eq-S3})$$

where,  $v_i/v_f$  is vibrational quantum number of state  $i/f$  and  $H'$  is the interaction between 2 different Born-Oppenheimer states and calculated as  $H'\psi_{iv_i} = H^{NA}\Phi_i(r:Q)\Theta_{iv_i}(Q) + H^{SO}\Phi_i(r:Q)\Theta_{iv_i}(Q)$ , where  $H^{NA}$  is the non-adiabatic coupling operator,  $H^{SO}$  is the spin-orbital coupling operator,  $r$  and  $Q$  are the electronic and nuclear normal mode coordinates.<sup>28</sup>

By applying a displayed oscillator mode and short time approximation, the internal conversion rate constant can be derived as:

$$\log k_{ic, l}(\omega_{if}) \propto -(-\omega_{if} + \omega_i + \sum_{j(j \neq l)} S_j \omega_j)^2 / 2 \sum_{j(j \neq l)} S_j \omega_j^2 (2n_j + 1) \quad (\text{eq-S3'})$$

Where  $S_j = \omega_j D_j^2 / 2\hbar$  is the Huang-Rhys factor and  $D_j$  is the displacement of  $j$ th mode,  $n_j$  is the phonon distribution function and  $\lambda_j = S_j \hbar \omega_j$  is the reorganization of  $j$ th accepting mode.

By applying short-time approximation under the framework of the displaced harmonic oscillator model, the non-radiative decay rate constant for  $T_1 \rightarrow S_0$  can be calculated as:

$$k'_{isc} = \exp \left[ -\frac{(\Delta E_{ad} - \sum_k \lambda_k)^2}{4 \sum_k \lambda_k E_k} + \ln \left( \frac{1}{\hbar} |\langle S_0 | H^{SO} | T_1 \rangle|^2 \sqrt{\frac{\pi}{\sum_k \lambda_k E_k}} \right) \right] \text{ (eq-S3'')}$$

Where  $\Delta E_{ad}$  is the adiabatic excitation energy;  $\lambda_k = S_k \hbar \omega_k = \omega_k^2 D_k^2 / 2$  is the reorganization energy for the  $k$ th mode;  $S_k$  and  $D_k$  are the Huang-Rhys factor and displacement of the mode with frequency of  $\omega_k$ , respectively;  $E_k$  is the average vibration energy.

The transition dipole moment for phosphorescence was calculated as eq-S4:

$$\mu_{ST_\kappa} = \sum_{\kappa}^{\{singlets\}} \frac{\langle S | \mu | {}^1k \rangle \langle {}^1k | H^{SO} | T_\kappa \rangle}{{}^3E_T^0 - {}^1E_k^0} + \sum_n^{\{triplets\}} \sum_{\kappa'=1}^3 \frac{\langle S | H^{SO} | {}^3n_{\kappa'} \rangle \langle {}^3n_{\kappa'} | \mu | T_\kappa \rangle}{{}^1E_S^0 - {}^3E_n^0} \text{ (eq-S4)}$$

where  $\kappa$  is the magnetic quantum number,  $n$  and  $k$  are the intermediate triplet and singlet electronic states, respectively. Applying the Franck-Condon approximation, the phosphorescence spectra were calculated as eq-S5<sup>23</sup>:

$$\sigma_{ph}(\omega, T) = \frac{4\omega^3}{3\hbar c^3} \times \sum_{v_i, v_f} P_{iv_i}(T) \left| \langle \Theta_{f, v_f} | \mu_{ST} | \Theta_{i, v_i} \rangle \right|^2 \delta(\omega_{i, v_i, f, v_f} - \omega) \text{ (eq-S5)}$$

The radiative decay rate constant was calculated as the integration of the phosphorescence spectra.

The intersystem crossing rate constant can be calculated as:

$$k_{isc} = k_{isc}^{(0)} + k_{isc}^{(1)} + k_{isc}^{(2)} \text{ (eq-S6)}$$

where:

$$k_{isc}^{(0)} = \frac{2\pi}{\hbar} \sum_{v_i, v_f} P_{iv_i} \left| H'_{fv_f, iv_i} \right|^2 \times \delta(E_{iv_i} - E_{fv_f}) \quad (\text{eq-S7})$$

$$k_{isc}^{(1)} = \frac{2\pi}{\hbar} \sum_{v_i, v_f} P_{iv_i} 2\text{Re} \left( H'_{fv_f, iv_i} \sum_{n, v_n} \frac{H'_{fv_f, nv_n} H'_{nv_n, iv_i}}{E_{iv_i} - E_{nv_n}} \right) \times \delta(E_{iv_i} - E_{fv_f}) \quad (\text{eq-S8})$$

$$k_{isc}^{(2)} = \frac{2\pi}{\hbar} \sum_{v_i, v_f} P_{iv_i} \left| \sum_{n, v_n} \frac{H'_{fv_f, nv_n} H'_{nv_n, iv_i}}{E_{iv_i} - E_{nv_n}} \right|^2 \times \delta(E_{iv_i} - E_{fv_f}) \quad (\text{eq-S9})$$

Where  $H'$  is the interaction between 2 different Born-Oppenheimer states and calculated as  $H'\psi_{iv_i} = H^{NA}\Phi_i(r:Q)\Theta_{iv_i}(Q) + H^{SO}\Phi_i(r:Q)\Theta_{iv_i}(Q)$ , where  $H^{NA}$  is the non-adiabatic coupling operator,  $H^{SO}$  is the spin-orbital coupling operator. More details on calculation of these spectra and rate constants can be found in Ref. 15-24.

### The Simplified Kinetic Model

Based on the calculated photophysical properties and rate constants, the photophysical processes involved for evolution of FL and 8AmFL under continuous irradiation can be derived. They start with the population of FL and 8AmFL to spin allowed  $S_1$ . Then, the excited FL and 8AmFL would evolve via IC and FE from  $S_1$ . In absence of ICT for FL and 8AmFL, energy downhill ISC  $S_1 \rightarrow T_n$  processes may also take place competing with IC and FE. After reaching  $T_n$ , excited FL and 8AmFL would decay into spin allowed  $T_1$  very fast. Finally, these excited FL and 8AmFL at  $T_1$  would decay via PE or nonradiative decay back to  $S_0$ .

The equations describing concentration of FL and 8AmFL at  $S_0$ ,  $S_1$ ,  $T_1$ ,  $T_2$  and  $T_3$  as functions of time can be written as the following:

$$\frac{dc_{S_0}}{dt} = -k_{ad}c_{S_0} + c_{S_1}(k_f + k_{ic}) + \sum_1^n c_{T_n} [k_{p(T_n-S_0)} + k_{isc(T_n-S_0)}] \quad (\text{eq-S10})$$

$$\frac{dc_{S_1}}{dt} = k_{ad}c_{S_0} - c_{S_1}(k_f + k_{ic} + \sum_1^n k_{isc(S_1-T_n)}) + \sum_1^n c_{T_n} k_{RISC(T_n)} \quad (\text{eq-S11})$$

$$\frac{dc_{T_1}}{dt} = k_{isc(S_1-T_1)}c_{S_1} - c_{T_1}[k_p(T_1) + k_{isc(T_1-S_0)} + k_{RISC(T_1)}] + k_{ic(T_3-T_1)}c_{T_3} + k_{ic(T_2-T_1)}c_{T_2} \quad (\text{eq-S12})$$

$$\frac{dc_{T_2}}{dt} = k_{isc(S_1-T_2)}c_{S_1} + k_{ic(T_3-T_2)}c_{T_3} - c_{T_2}[k_p(T_2) + k_{isc(T_2-S_0)} + k_{ic(T_2-T_1)} + k_{RISC(T_2)}] \quad (\text{eq-S13})$$

$$\frac{dc_{T_3}}{dt} = k_{isc(S_1-T_3)}c_{S_1} - c_{T_3}[k_p(T_3) + k_{isc(T_3-S_0)} + k_{ic(T_3-T_1)} + k_{ic(T_3-T_2)} + k_{RISC(T_3)}] \quad (\text{eq-S14})$$

Further to these,

$$k_{ad} = \sigma F \quad (\text{eq-S15})$$

$$F = \frac{P}{Ah\nu} = 6.79 \times 10^{19} \text{Photons} \cdot \text{cm}^{-2} \cdot \text{s}^{-1} \quad (\text{eq-S16})$$

$$10^{-\varepsilon cd} = e^{-\sigma nd} \quad (\text{eq-S17})$$

$$\sigma = \varepsilon \ln 10 \frac{c}{n} = \varepsilon \alpha = \alpha \varepsilon \quad (\text{eq-S18})$$

$$\alpha = 3.82 \times 10^{-21} \text{mol} \cdot \text{cm}^3 \cdot \text{L}^{-1} \quad (\text{eq-S19})$$

where  $\sigma$  is the absorption cross-section of sensitizer,  $P$  is the input power of light radiation at 455 nm, that is 30 W,  $\varepsilon$  is the molecular extinction constant ( $\text{dm}^3 \text{mol}^{-1} \text{cm}^{-1}$ ),  $c$  is the concentration, in  $\text{mol L}^{-1}$ ,  $n$  is the particle density, in  $\text{cm}^{-3}$ ,  $d$  is path depth, in cm,  $\alpha$  is the conversion constant,  $\nu$  is the frequency,  $A$  is the cross-section of light, that is  $1 \text{ cm}^2$ .

By solving equations Eq-S10 to Eq-S14 iteratively, with Eq-S16 to Eq-S19, calculated photophysical properties in Tables 1, 2 and 3, and assuming FL and 8AmFL are dissolved in dichloromethane solution of 0.033 mol/L at 298 K under continuous irradiation at wavelength of 455 nm, the steady state concentration of FL and 8AmFL at  $S_0$ ,  $S_1$ ,  $T_1$ ,  $T_2$  and  $T_3$  can be obtained.

Table S1 Electronic transitions involved in the excitation of FL calculated at CAM-B3LYP/6-311G(d) level of theory.

|                          | Energy              | $f^a$  | Composition <sup>b</sup> | CI <sup>c</sup> | Character                                    |
|--------------------------|---------------------|--------|--------------------------|-----------------|----------------------------------------------|
| $S_0 \rightarrow S_1$    | 3.4258 eV/361.91 nm | 0.3385 | 59 $\rightarrow$ 60      | 0.69794         | $\pi \rightarrow \pi^*, n \rightarrow \pi^*$ |
| $S_0 \rightarrow S_2$    | 3.7314 eV/332.28 nm | 0.0014 | 52 $\rightarrow$ 60      | 0.17627         | $n \rightarrow \pi^*$                        |
|                          |                     |        | 56 $\rightarrow$ 60      | 0.49562         | $n \rightarrow \pi^*$                        |
|                          |                     |        | 57 $\rightarrow$ 60      | 0.44861         | $n \rightarrow \pi^*$                        |
| $S_0 \rightarrow S_3$    | 4.2272 eV/293.30 nm | 0.0000 | 54 $\rightarrow$ 60      | 0.27741         | $n \rightarrow \pi^*$                        |
|                          |                     |        | 54 $\rightarrow$ 63      | 0.10413         | $n \rightarrow \pi^*$                        |
|                          |                     |        | 56 $\rightarrow$ 60      | 0.40692         | $n \rightarrow \pi^*$                        |
|                          |                     |        | 57 $\rightarrow$ 60      | 0.44577         | $n \rightarrow \pi^*$                        |
|                          |                     |        | 57 $\rightarrow$ 63      | 0.13391         | $n \rightarrow \pi^*$                        |
| $S_0 \rightarrow S_4$    | 4.2905 eV/288.97 nm | 0.1776 | 58 $\rightarrow$ 60      | 0.68343         | $\pi \rightarrow \pi^*, n \rightarrow \pi^*$ |
|                          |                     |        | 59 $\rightarrow$ 61      | 0.14822         | $\pi \rightarrow \pi^*, n \rightarrow \pi^*$ |
| $S_0 \rightarrow S_5$    | 5.0209 eV/246.94 nm | 0.1173 | 53 $\rightarrow$ 60      | 0.23992         | $\pi \rightarrow \pi^*, n \rightarrow \pi^*$ |
|                          |                     |        | 55 $\rightarrow$ 60      | 0.48663         | $n \rightarrow \pi^*$                        |
|                          |                     |        | 59 $\rightarrow$ 61      | 0.40244         | $\pi \rightarrow \pi^*, n \rightarrow \pi^*$ |
| $S_0 \rightarrow S_6$    | 5.0678 eV/244.65 nm | 0.0001 | 52 $\rightarrow$ 60      | 0.29850         | $n \rightarrow \pi^*$                        |
|                          |                     |        | 54 $\rightarrow$ 60      | 0.47776         | $n \rightarrow \pi^*$                        |
|                          |                     |        | 56 $\rightarrow$ 60      | 0.20549         | $n \rightarrow \pi^*$                        |
|                          |                     |        | 56 $\rightarrow$ 61      | 0.19740         | $n \rightarrow \pi^*$                        |
|                          |                     |        | 56 $\rightarrow$ 65      | 0.10638         | $n \rightarrow \pi^*$                        |
|                          |                     |        | 57 $\rightarrow$ 60      | 0.16024         | $n \rightarrow \pi^*$                        |
|                          |                     |        | 57 $\rightarrow$ 61      | 0.12347         | $n \rightarrow \pi^*$                        |
| $S_0 \rightarrow S_7$    | 5.2021 eV/238.33 nm | 0.0001 | 52 $\rightarrow$ 60      | 0.50961         | $n \rightarrow \pi^*$                        |
|                          |                     |        | 54 $\rightarrow$ 60      | 0.28077         | $n \rightarrow \pi^*$                        |
|                          |                     |        | 56 $\rightarrow$ 61      | 0.19576         | $n \rightarrow \pi^*$                        |
|                          |                     |        | 57 $\rightarrow$ 60      | 0.14898         | $n \rightarrow \pi^*$                        |
|                          |                     |        | 57 $\rightarrow$ 61      | 0.21567         | $n \rightarrow \pi^*$                        |
| $S_0 \rightarrow S_8$    | 5.3297 eV/232.63 nm | 0.7328 | 55 $\rightarrow$ 60      | 0.4605          | $n \rightarrow \pi^*$                        |
|                          |                     |        | 59 $\rightarrow$ 61      | 0.50447         | $\pi \rightarrow \pi^*, n \rightarrow \pi^*$ |
| $S_0 \rightarrow S_9$    | 5.4768 eV/226.38 nm | 0.0223 | 53 $\rightarrow$ 60      | 0.44879         | $\pi \rightarrow \pi^*, n \rightarrow \pi^*$ |
|                          |                     |        | 55 $\rightarrow$ 60      | 0.16577         | $n \rightarrow \pi^*$                        |
|                          |                     |        | 58 $\rightarrow$ 60      | 0.10048         | $\pi \rightarrow \pi^*, n \rightarrow \pi^*$ |
|                          |                     |        | 58 $\rightarrow$ 61      | 0.35326         | $\pi \rightarrow \pi^*, n \rightarrow \pi^*$ |
|                          |                     |        | 59 $\rightarrow$ 61      | 0.18744         | $\pi \rightarrow \pi^*, n \rightarrow \pi^*$ |
|                          |                     |        | 59 $\rightarrow$ 62      | 0.27446         | $\pi \rightarrow \pi^*, n \rightarrow \pi^*$ |
| $S_0 \rightarrow S_{10}$ | 5.9077 eV/209.87 nm | 0.0612 | 53 $\rightarrow$ 60      | 0.46057         | $\pi \rightarrow \pi^*, n \rightarrow \pi^*$ |
|                          |                     |        | 53 $\rightarrow$ 62      | 0.10761         | $\pi \rightarrow \pi^*, n \rightarrow \pi^*$ |
|                          |                     |        | 58 $\rightarrow$ 61      | 0.26974         | $\pi \rightarrow \pi^*, n \rightarrow \pi^*$ |
|                          |                     |        | 59 $\rightarrow$ 62      | 0.41639         | $\pi \rightarrow \pi^*, n \rightarrow \pi^*$ |
| $S_0 \rightarrow T_1$    | 2.2932 eV/540.67 nm | 0.0000 | 58 $\rightarrow$ 60      | 0.21460         | $\pi \rightarrow \pi^*, n \rightarrow \pi^*$ |
|                          |                     |        | 59 $\rightarrow$ 60      | 0.65825         | $\pi \rightarrow \pi^*, n \rightarrow \pi^*$ |
| $S_0 \rightarrow T_2$    | 2.8810 eV/430.35 nm | 0.0000 | 58 $\rightarrow$ 60      | 0.56464         | $\pi \rightarrow \pi^*, n \rightarrow \pi^*$ |

|                       |                     |        |         |         |                                              |
|-----------------------|---------------------|--------|---------|---------|----------------------------------------------|
|                       |                     |        | 58 → 62 | 0.21162 | $\pi \rightarrow \pi^*, n \rightarrow \pi^*$ |
|                       |                     |        | 59 → 60 | 0.21002 | $\pi \rightarrow \pi^*, n \rightarrow \pi^*$ |
|                       |                     |        | 59 → 61 | 0.24325 | $\pi \rightarrow \pi^*, n \rightarrow \pi^*$ |
| $S_0 \rightarrow T_3$ | 3.1258 eV/396.65 nm | 0.0000 | 52 → 60 | 0.27122 | $n \rightarrow \pi^*$                        |
|                       |                     |        | 56 → 60 | 0.47833 | $n \rightarrow \pi^*$                        |
|                       |                     |        | 57 → 60 | 0.39553 | $n \rightarrow \pi^*$                        |
| $S_0 \rightarrow T_4$ | 3.8959 eV/318.24 nm | 0.0000 | 53 → 60 | 0.20230 | $\pi \rightarrow \pi^*, n \rightarrow \pi^*$ |
|                       |                     |        | 55 → 60 | 0.13346 | $n \rightarrow \pi^*$                        |
|                       |                     |        | 58 → 60 | 0.26530 | $\pi \rightarrow \pi^*, n \rightarrow \pi^*$ |
|                       |                     |        | 59 → 61 | 0.57453 | $\pi \rightarrow \pi^*, n \rightarrow \pi^*$ |
| $S_0 \rightarrow T_5$ | 3.8988 eV/318.01 nm | 0.0000 | 54 → 60 | 0.29867 | $n \rightarrow \pi^*$                        |
|                       |                     |        | 54 → 63 | 0.14103 | $n \rightarrow \pi^*$                        |
|                       |                     |        | 56 → 60 | 0.33699 | $n \rightarrow \pi^*$                        |
|                       |                     |        | 57 → 60 | 0.45309 | $n \rightarrow \pi^*$                        |
|                       |                     |        | 57 → 61 | 0.17204 | $n \rightarrow \pi^*$                        |

---



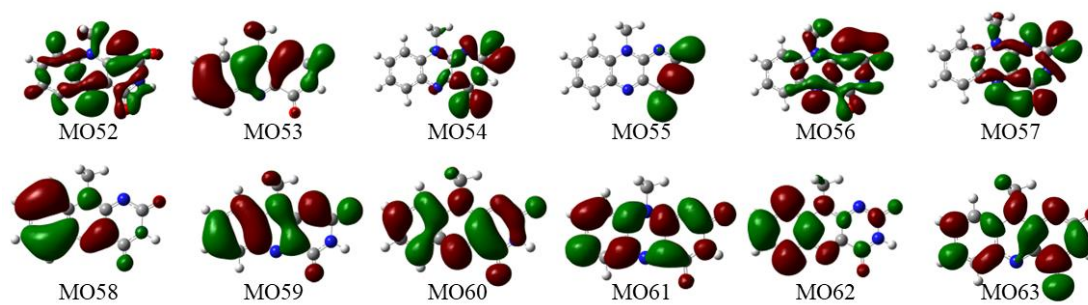

Figure S1. Isosurface plots of frontier molecular orbitals of FL involved in electron transitions contribute to UV-vis absorption obtained with calculations at CAM-B3LYP/6-311g(d) level of theory. (Isovalue:  $\pm 0.02$  a.u.; C: Gray; O: Red; N: Blue; H: White.)

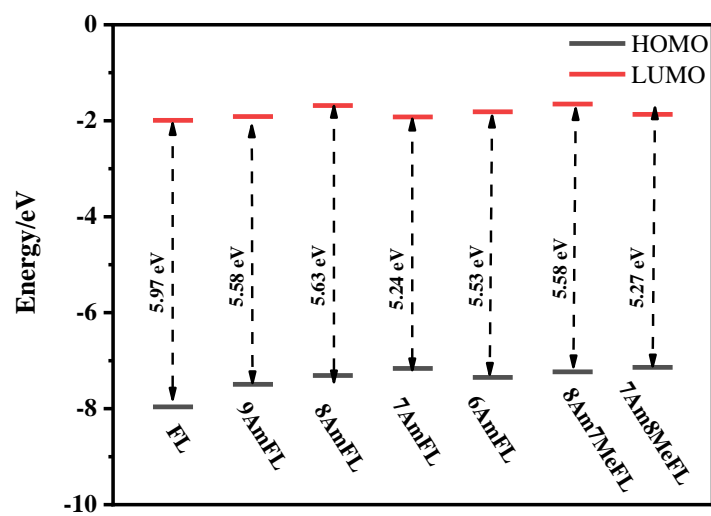

Figure S2. HOMO and LUMO of FL and AmFLs.

Table S2. Eigenvalues of HOMO and LUMO of FL and AmFLs.

| Mol      | E(HOMO)/eV | E(LUMO)/eV | $\Delta E/eV$ |
|----------|------------|------------|---------------|
| FL       | -7.96      | -1.99      | 5.97          |
| 9AmFL    | -7.49      | -1.91      | 5.58          |
| 8AmFL    | -7.31      | -1.68      | 5.63          |
| 7AmFL    | -7.16      | -1.92      | 5.24          |
| 6AmFL    | -7.35      | -1.81      | 5.53          |
| 8Am7MeFL | -7.23      | -1.65      | 5.58          |
| 7Am8MeFL | -7.14      | -1.87      | 5.27          |

Table S3 Electronic transitions involved in the excitation of 6AmFL calculated at CAM-B3LYP/6-311G(d) level of theory.

|                                 | Energy              | f      | Composition | CI      | Character |
|---------------------------------|---------------------|--------|-------------|---------|-----------|
| S <sub>0</sub> →S <sub>1</sub>  | 2.9733 eV/416.99 nm | 0.1659 | 63 → 64     | 0.70225 | n→π*      |
| S <sub>0</sub> →S <sub>2</sub>  | 3.5179 eV/352.44 nm | 0.3503 | 62 → 64     | 0.69493 | n→π*      |
| S <sub>0</sub> →S <sub>3</sub>  | 3.8932 eV/318.46 nm | 0.0015 | 56 → 64     | 0.19485 | n→π*      |
|                                 |                     |        | 60 → 64     | 0.58553 | n→π*      |
|                                 |                     |        | 61 → 64     | 0.31220 | n→π*      |
| S <sub>0</sub> →S <sub>4</sub>  | 4.3393 eV/285.73 nm | 0.0000 | 57 → 64     | 0.27834 | n→π*      |
|                                 |                     |        | 60 → 64     | 0.28384 | n→π*      |
|                                 |                     |        | 61 → 64     | 0.53171 | n→π*      |
|                                 |                     |        | 61 → 66     | 0.10598 | n→π*      |
|                                 |                     |        | 61 → 67     | 0.12296 | n→π*      |
| S <sub>0</sub> →S <sub>5</sub>  | 4.7470 eV/261.19 nm | 0.2324 | 58 → 64     | 0.17236 | π→π*,n→π* |
|                                 |                     |        | 62 → 66     | 0.10394 | π→π*,n→π* |
|                                 |                     |        | 63 → 65     | 0.64404 | π→π*,n→π* |
|                                 |                     |        | 63 → 69     | 0.10244 | π→π*,n→π* |
| S <sub>0</sub> →S <sub>6</sub>  | 5.0960 eV/243.30 nm | 0.0259 | 58 → 64     | 0.18828 | π→π*,n→π* |
|                                 |                     |        | 59 → 64     | 0.43202 | n→π*      |
|                                 |                     |        | 62 → 65     | 0.48245 | π→π*,n→π* |
|                                 |                     |        | 63 → 65     | 0.12086 | π→π*,n→π* |
| S <sub>0</sub> →S <sub>7</sub>  | 5.1788 eV/239.41 nm | 0.0001 | 56 → 64     | 0.26331 | n→π*      |
|                                 |                     |        | 57 → 64     | 0.48541 | n→π*      |
|                                 |                     |        | 60 → 64     | 0.15361 | n→π*      |
|                                 |                     |        | 60 → 65     | 0.15998 | n→π*      |
|                                 |                     |        | 61 → 64     | 0.20734 | n→π*      |
|                                 |                     |        | 61 → 65     | 0.19820 | n→π*      |
|                                 |                     |        | 61 → 69     | 0.12280 | n→π*      |
| S <sub>0</sub> →S <sub>8</sub>  | 5.3250 eV/232.83 nm | 0.0002 | 56 → 64     | 0.51583 | n→π*      |
|                                 |                     |        | 57 → 64     | 0.24533 | n→π*      |
|                                 |                     |        | 60 → 65     | 0.27350 | n→π*      |
|                                 |                     |        | 61 → 64     | 0.12019 | n→π*      |
|                                 |                     |        | 61 → 65     | 0.16252 | n→π*      |
| S <sub>0</sub> →S <sub>9</sub>  | 5.4021 eV/229.51 nm | 0.4613 | 59 → 64     | 0.51773 | n→π*      |
|                                 |                     |        | 62 → 65     | 0.45090 | π→π*,n→π* |
| S <sub>0</sub> →S <sub>10</sub> | 5.6357 eV/220.00 nm | 0.2962 | 58 → 64     | 0.64406 | π→π*,n→π* |
|                                 |                     |        | 59 → 64     | 0.13861 | n→π*      |
|                                 |                     |        | 62 → 65     | 0.16816 | π→π*,n→π* |
|                                 |                     |        | 63 → 65     | 0.13413 | π→π*,n→π* |
| S <sub>0</sub> →T <sub>1</sub>  | 2.0109 eV/616.56 nm | 0.0000 | 62 → 64     | 0.36467 | π→π*,n→π* |
|                                 |                     |        | 63 → 64     | 0.58576 | π→π*,n→π* |
|                                 |                     |        | 63 → 66     | 0.11559 | π→π*,n→π* |
| S <sub>0</sub> →T <sub>2</sub>  | 2.5144 eV/493.10 nm | 0.0000 | 63 → 64     | 0.58507 | π→π*,n→π* |
|                                 |                     |        | 63 → 64     | 0.35119 | π→π*,n→π* |

|                       |                     |        |                     |         |                                              |
|-----------------------|---------------------|--------|---------------------|---------|----------------------------------------------|
| $S_0 \rightarrow T_3$ | 3.2995 eV/375.77 nm | 0.0000 | 56 $\rightarrow$ 64 | 0.29732 | $n \rightarrow \pi^*$                        |
|                       |                     |        | 60 $\rightarrow$ 64 | 0.55426 | $n \rightarrow \pi^*$                        |
|                       |                     |        | 61 $\rightarrow$ 64 | 0.25899 | $n \rightarrow \pi^*$                        |
| $S_0 \rightarrow T_4$ | 3.6458 eV/340.08 nm | 0.0000 | 58 $\rightarrow$ 64 | 0.18334 | $\pi \rightarrow \pi^*, n \rightarrow \pi^*$ |
|                       |                     |        | 62 $\rightarrow$ 65 | 0.42082 | $\pi \rightarrow \pi^*, n \rightarrow \pi^*$ |
|                       |                     |        | 63 $\rightarrow$ 65 | 0.41860 | $\pi \rightarrow \pi^*, n \rightarrow \pi^*$ |
|                       |                     |        | 63 $\rightarrow$ 66 | 0.17782 | $\pi \rightarrow \pi^*, n \rightarrow \pi^*$ |
|                       |                     |        | 63 $\rightarrow$ 67 | 0.18424 | $\pi \rightarrow \pi^*, n \rightarrow \pi^*$ |
| $S_0 \rightarrow T_5$ | 3.9154 eV/316.66 nm | 0.0000 | 54 $\rightarrow$ 64 | 0.10261 | $n \rightarrow \pi^*$                        |
|                       |                     |        | 58 $\rightarrow$ 64 | 0.29148 | $\pi \rightarrow \pi^*, n \rightarrow \pi^*$ |
|                       |                     |        | 59 $\rightarrow$ 64 | 0.13814 | $n \rightarrow \pi^*$                        |
|                       |                     |        | 62 $\rightarrow$ 65 | 0.36636 | $\pi \rightarrow \pi^*, n \rightarrow \pi^*$ |
|                       |                     |        | 63 $\rightarrow$ 65 | 0.38647 | $\pi \rightarrow \pi^*, n \rightarrow \pi^*$ |
|                       |                     |        | 63 $\rightarrow$ 66 | 0.17947 | $\pi \rightarrow \pi^*, n \rightarrow \pi^*$ |
|                       |                     |        | 63 $\rightarrow$ 67 | 0.15624 | $\pi \rightarrow \pi^*, n \rightarrow \pi^*$ |

---

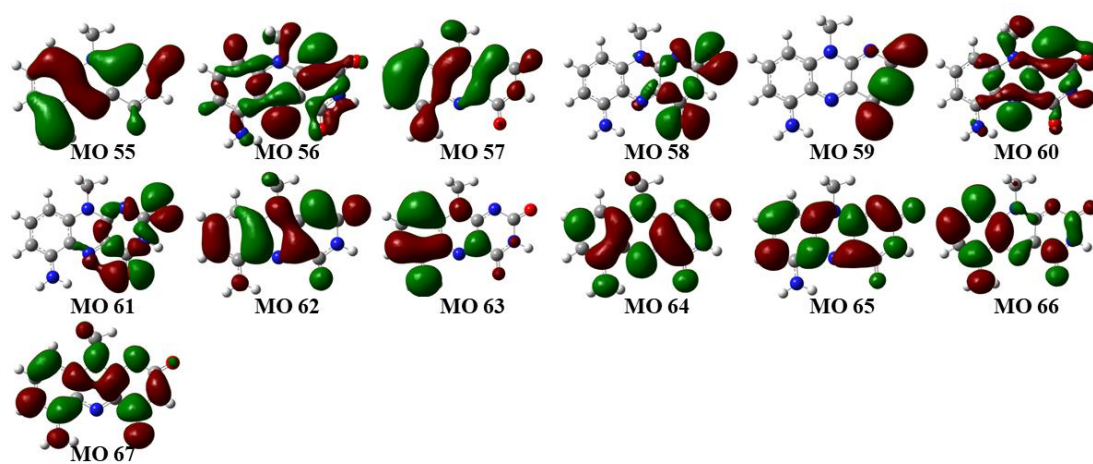

Figure S3. Isosurface plots of frontier molecular orbitals of 6AmFL involved in electron transitions contribute to UV-vis absorption obtained with calculations at CAM-B3LYP/6-311g(d) level of theory. (Isovalue:  $\pm 0.02$  a.u.; C: Gray; O: Red; N: Blue; H: White.)

Table S4 Electronic transitions involved in the excitation of 7AmFL calculated at CAM-B3LYP/6-311G(d) level of theory.

|                                 | Energy              | f      | Composition | CI      | Character                                    |
|---------------------------------|---------------------|--------|-------------|---------|----------------------------------------------|
| S <sub>0</sub> →S <sub>1</sub>  | 2.8720 eV/431.70 nm | 0.2251 | 63 → 64     | 0.69944 | $\pi \rightarrow \pi^*, n \rightarrow \pi^*$ |
| S <sub>0</sub> →S <sub>2</sub>  | 3.7220 eV/333.11 nm | 0.0014 | 56 → 64     | 0.18450 | $n \rightarrow \pi^*$                        |
|                                 |                     |        | 60 → 64     | 0.49029 | $n \rightarrow \pi^*$                        |
|                                 |                     |        | 61 → 64     | 0.45011 | $n \rightarrow \pi^*$                        |
| S <sub>0</sub> →S <sub>3</sub>  | 4.1106 eV/301.62 nm | 0.2457 | 62 → 64     | 0.68733 | $\pi \rightarrow \pi^*, n \rightarrow \pi^*$ |
|                                 |                     |        | 63 → 65     | 0.11609 | $\pi \rightarrow \pi^*, n \rightarrow \pi^*$ |
| S <sub>0</sub> →S <sub>4</sub>  | 4.2393 eV/292.46 nm | 0.0000 | 57 → 64     | 0.28776 | $n \rightarrow \pi^*$                        |
|                                 |                     |        | 60 → 64     | 0.40686 | $n \rightarrow \pi^*$                        |
|                                 |                     |        | 61 → 64     | 0.43796 | $n \rightarrow \pi^*$                        |
|                                 |                     |        | 61 → 67     | 0.12585 | $n \rightarrow \pi^*$                        |
| S <sub>0</sub> →S <sub>5</sub>  | 4.6721 eV/265.37 nm | 0.2036 | 58 → 64     | 0.20921 | $n \rightarrow \pi^*$                        |
|                                 |                     |        | 59 → 64     | 0.40419 | $\pi \rightarrow \pi^*, n \rightarrow \pi^*$ |
|                                 |                     |        | 63 → 65     | 0.49948 | $\pi \rightarrow \pi^*, n \rightarrow \pi^*$ |
| S <sub>0</sub> →S <sub>6</sub>  | 5.0923 eV/243.47 nm | 0.0509 | 63 → 66     | 0.11405 | $\pi \rightarrow \pi^*, n \rightarrow \pi^*$ |
|                                 |                     |        | 56 → 64     | 0.32258 | $n \rightarrow \pi^*$                        |
|                                 |                     |        | 57 → 64     | 0.43981 | $n \rightarrow \pi^*$                        |
|                                 |                     |        | 59 → 64     | 0.15023 | $\pi \rightarrow \pi^*, n \rightarrow \pi^*$ |
|                                 |                     |        | 60 → 64     | 0.20401 | $n \rightarrow \pi^*$                        |
|                                 |                     |        | 60 → 65     | 0.20161 | $n \rightarrow \pi^*$                        |
|                                 |                     |        | 61 → 64     | 0.15490 | $n \rightarrow \pi^*$                        |
| S <sub>0</sub> →S <sub>7</sub>  | 5.1079 eV/242.73 nm | 0.7363 | 61 → 65     | 0.10913 | $n \rightarrow \pi^*$                        |
|                                 |                     |        | 63 → 65     | 0.11377 | $\pi \rightarrow \pi^*, n \rightarrow \pi^*$ |
|                                 |                     |        | 57 → 64     | 0.12607 | $n \rightarrow \pi^*$                        |
|                                 |                     |        | 59 → 64     | 0.49707 | $\pi \rightarrow \pi^*, n \rightarrow \pi^*$ |
| S <sub>0</sub> →S <sub>8</sub>  | 5.2092 eV/238.01 nm | 0.0534 | 63 → 65     | 0.42406 | $\pi \rightarrow \pi^*, n \rightarrow \pi^*$ |
|                                 |                     |        | 56 → 64     | 0.12387 | $n \rightarrow \pi^*$                        |
|                                 |                     |        | 58 → 64     | 0.55565 | $n \rightarrow \pi^*$                        |
|                                 |                     |        | 59 → 64     | 0.11243 | $\pi \rightarrow \pi^*, n \rightarrow \pi^*$ |
| S <sub>0</sub> →S <sub>9</sub>  | 5.2135 eV/237.81 nm | 0.0021 | 62 → 65     | 0.13810 | $\pi \rightarrow \pi^*, n \rightarrow \pi^*$ |
|                                 |                     |        | 63 → 66     | 0.32357 | $\pi \rightarrow \pi^*, n \rightarrow \pi^*$ |
|                                 |                     |        | 56 → 64     | 0.48664 | $n \rightarrow \pi^*$                        |
|                                 |                     |        | 57 → 64     | 0.30237 | $n \rightarrow \pi^*$                        |
|                                 |                     |        | 58 → 64     | 0.13554 | $n \rightarrow \pi^*$                        |
|                                 |                     |        | 60 → 65     | 0.16447 | $n \rightarrow \pi^*$                        |
| S <sub>0</sub> →S <sub>10</sub> | 5.2907 eV/234.34 nm | 0.1703 | 61 → 64     | 0.16576 | $n \rightarrow \pi^*$                        |
|                                 |                     |        | 61 → 65     | 0.21180 | $n \rightarrow \pi^*$                        |
|                                 |                     |        | 58 → 64     | 0.31530 | $n \rightarrow \pi^*$                        |
|                                 |                     |        | 59 → 64     | 0.18281 | $\pi \rightarrow \pi^*, n \rightarrow \pi^*$ |
|                                 |                     |        | 62 → 65     | 0.13063 | $\pi \rightarrow \pi^*, n \rightarrow \pi^*$ |
|                                 |                     |        | 63 → 65     | 0.10179 | $\pi \rightarrow \pi^*, n \rightarrow \pi^*$ |
|                                 |                     |        | 63 → 66     | 0.55480 | $\pi \rightarrow \pi^*, n \rightarrow \pi^*$ |

|                       |                     |        |                     |         |                                              |
|-----------------------|---------------------|--------|---------------------|---------|----------------------------------------------|
| $S_0 \rightarrow T_1$ | 1.8667 eV/664.20 nm | 0.0000 | 62 $\rightarrow$ 64 | 0.13942 | $\pi \rightarrow \pi^*, n \rightarrow \pi^*$ |
|                       |                     |        | 63 $\rightarrow$ 64 | 0.68384 | $\pi \rightarrow \pi^*, n \rightarrow \pi^*$ |
|                       |                     |        | 64 $\rightarrow$ 63 | 0.10284 | $n \rightarrow \pi^*$                        |
| $S_0 \rightarrow T_2$ | 2.7162 eV/456.47 nm | 0.0000 | 59 $\rightarrow$ 64 | 0.19705 | $\pi \rightarrow \pi^*, n \rightarrow \pi^*$ |
|                       |                     |        | 62 $\rightarrow$ 64 | 0.56987 | $\pi \rightarrow \pi^*, n \rightarrow \pi^*$ |
|                       |                     |        | 62 $\rightarrow$ 66 | 0.14376 | $\pi \rightarrow \pi^*, n \rightarrow \pi^*$ |
|                       |                     |        | 63 $\rightarrow$ 65 | 0.18811 | $\pi \rightarrow \pi^*, n \rightarrow \pi^*$ |
|                       |                     |        | 63 $\rightarrow$ 66 | 0.16661 | $\pi \rightarrow \pi^*, n \rightarrow \pi^*$ |
| $S_0 \rightarrow T_3$ | 3.1266 eV/396.55 nm | 0.0000 | 56 $\rightarrow$ 64 | 0.27866 | $n \rightarrow \pi^*$                        |
|                       |                     |        | 60 $\rightarrow$ 64 | 0.46958 | $n \rightarrow \pi^*$                        |
|                       |                     |        | 61 $\rightarrow$ 64 | 0.40082 | $n \rightarrow \pi^*$                        |
| $S_0 \rightarrow T_4$ | 3.4481 eV/359.57 nm | 0.0000 | 59 $\rightarrow$ 64 | 0.29563 | $\pi \rightarrow \pi^*, n \rightarrow \pi^*$ |
|                       |                     |        | 62 $\rightarrow$ 64 | 0.27703 | $\pi \rightarrow \pi^*, n \rightarrow \pi^*$ |
|                       |                     |        | 63 $\rightarrow$ 65 | 0.52233 | $\pi \rightarrow \pi^*, n \rightarrow \pi^*$ |
|                       |                     |        | 63 $\rightarrow$ 66 | 0.10627 | $\pi \rightarrow \pi^*, n \rightarrow \pi^*$ |
| $S_0 \rightarrow T_5$ | 3.9164 eV/316.58 nm | 0.0000 | 57 $\rightarrow$ 64 | 0.30987 | $n \rightarrow \pi^*$                        |
|                       |                     |        | 57 $\rightarrow$ 67 | 0.13037 | $n \rightarrow \pi^*$                        |
|                       |                     |        | 60 $\rightarrow$ 64 | 0.34186 | $n \rightarrow \pi^*$                        |
|                       |                     |        | 61 $\rightarrow$ 64 | 0.44014 | $n \rightarrow \pi^*$                        |
|                       |                     |        | 61 $\rightarrow$ 67 | 0.16193 | $n \rightarrow \pi^*$                        |

---



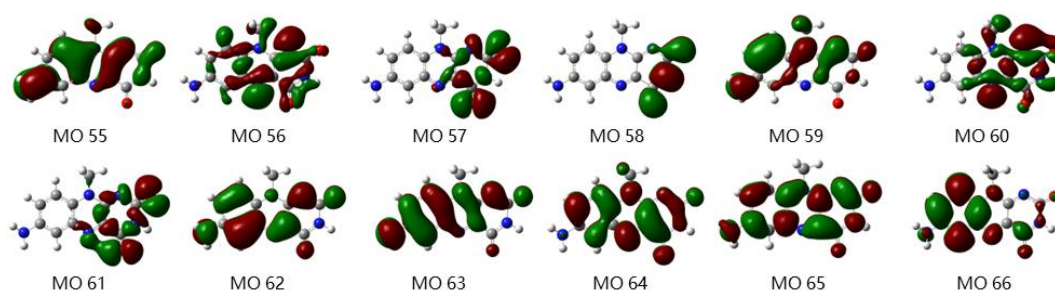

Figure S4. Isosurface plots of frontier molecular orbitals of 7AmFL involved in electron transitions contribute to UV-vis absorption calculated at CAM-B3LYP/6-311g(d) level of theory. (Isovalue:  $\pm 0.02$  a.u.; C: Gray; O: Red; N: Blue; H: White.)

Table S5. Electronic transitions involved in the excitation of 8AmFL calculated at CAM-B3LYP/6-311G(d) level of theory.

|                                 | Energy              | f      | Composition | CI      | Character                                    |
|---------------------------------|---------------------|--------|-------------|---------|----------------------------------------------|
| S <sub>0</sub> →S <sub>1</sub>  | 3.2766 eV/378.39 nm | 0.7283 | 63 → 64     | 0.69231 | $\pi \rightarrow \pi^*, n \rightarrow \pi^*$ |
| S <sub>0</sub> →S <sub>2</sub>  | 3.9115 eV/316.97 nm | 0.0016 | 56 → 64     | 0.19472 | $n \rightarrow \pi^*$                        |
|                                 |                     |        | 60 → 64     | 0.57858 | $n \rightarrow \pi^*$                        |
|                                 |                     |        | 61 → 64     | 0.32551 | $n \rightarrow \pi^*$                        |
| S <sub>0</sub> →S <sub>3</sub>  | 3.9434 eV/314.41 nm | 0.0197 | 62 → 64     | 0.68570 | $\pi \rightarrow \pi^*, n \rightarrow \pi^*$ |
|                                 |                     |        | 63 → 65     | 0.10321 | $\pi \rightarrow \pi^*, n \rightarrow \pi^*$ |
| S <sub>0</sub> →S <sub>4</sub>  | 4.4070 eV/281.34 nm | 0.0000 | 57 → 64     | 0.26345 | $n \rightarrow \pi^*$                        |
|                                 |                     |        | 57 → 67     | 0.10505 | $n \rightarrow \pi^*$                        |
|                                 |                     |        | 60 → 64     | 0.29335 | $n \rightarrow \pi^*$                        |
|                                 |                     |        | 61 → 64     | 0.53054 | $n \rightarrow \pi^*$                        |
|                                 |                     |        | 61 → 67     | 0.15763 | $n \rightarrow \pi^*$                        |
| S <sub>0</sub> →S <sub>5</sub>  | 4.8349 eV/256.43 nm | 0.1062 | 58 → 64     | 0.16234 | $\pi \rightarrow \pi^*, n \rightarrow \pi^*$ |
|                                 |                     |        | 62 → 64     | 0.13305 | $\pi \rightarrow \pi^*, n \rightarrow \pi^*$ |
|                                 |                     |        | 63 → 65     | 0.63486 | $\pi \rightarrow \pi^*, n \rightarrow \pi^*$ |
|                                 |                     |        | 63 → 66     | 0.16761 | $\pi \rightarrow \pi^*, n \rightarrow \pi^*$ |
| S <sub>0</sub> →S <sub>6</sub>  | 5.1643 eV/240.08 nm | 0.0853 | 55 → 64     | 0.10971 | $\pi \rightarrow \pi^*, n \rightarrow \pi^*$ |
|                                 |                     |        | 58 → 64     | 0.34582 | $\pi \rightarrow \pi^*, n \rightarrow \pi^*$ |
|                                 |                     |        | 59 → 64     | 0.40251 | $n \rightarrow \pi^*$                        |
|                                 |                     |        | 62 → 65     | 0.33013 | $\pi \rightarrow \pi^*, n \rightarrow \pi^*$ |
|                                 |                     |        | 63 → 65     | 0.14447 | $\pi \rightarrow \pi^*, n \rightarrow \pi^*$ |
|                                 |                     |        | 63 → 66     | 0.23182 | $\pi \rightarrow \pi^*, n \rightarrow \pi^*$ |
| S <sub>0</sub> →S <sub>7</sub>  | 5.2253 eV/237.28 nm | 0.0001 | 56 → 64     | 0.29927 | $n \rightarrow \pi^*$                        |
|                                 |                     |        | 57 → 64     | 0.46495 | $n \rightarrow \pi^*$                        |
|                                 |                     |        | 57 → 67     | 0.10608 | $n \rightarrow \pi^*$                        |
|                                 |                     |        | 60 → 64     | 0.17243 | $n \rightarrow \pi^*$                        |
|                                 |                     |        | 60 → 65     | 0.18416 | $n \rightarrow \pi^*$                        |
|                                 |                     |        | 61 → 64     | 0.17867 | $n \rightarrow \pi^*$                        |
|                                 |                     |        | 61 → 65     | 0.16731 | $n \rightarrow \pi^*$                        |
|                                 |                     |        | 61 → 69     | 0.10288 | $n \rightarrow \pi^*$                        |
|                                 |                     |        | 61 → 65     | 0.19246 | $n \rightarrow \pi^*$                        |
| S <sub>0</sub> →S <sub>8</sub>  | 5.3638 eV/231.15 nm | 0.0001 | 56 → 64     | 0.48800 | $n \rightarrow \pi^*$                        |
|                                 |                     |        | 57 → 64     | 0.27733 | $n \rightarrow \pi^*$                        |
|                                 |                     |        | 60 → 65     | 0.24406 | $n \rightarrow \pi^*$                        |
|                                 |                     |        | 61 → 64     | 0.13922 | $n \rightarrow \pi^*$                        |
|                                 |                     |        | 61 → 65     | 0.19246 | $n \rightarrow \pi^*$                        |
| S <sub>0</sub> →S <sub>9</sub>  | 5.4865 eV/225.98 nm | 0.3800 | 59 → 64     | 0.52545 | $n \rightarrow \pi^*$                        |
|                                 |                     |        | 62 → 65     | 0.32282 | $\pi \rightarrow \pi^*, n \rightarrow \pi^*$ |
|                                 |                     |        | 63 → 65     | 0.15943 | $\pi \rightarrow \pi^*, n \rightarrow \pi^*$ |
|                                 |                     |        | 63 → 66     | 0.27038 | $\pi \rightarrow \pi^*, n \rightarrow \pi^*$ |
| S <sub>0</sub> →S <sub>10</sub> | 5.6499 eV/219.44 nm | 0.1234 | 58 → 64     | 0.56502 | $\pi \rightarrow \pi^*, n \rightarrow \pi^*$ |
|                                 |                     |        | 59 → 64     | 0.19872 | $n \rightarrow \pi^*$                        |
|                                 |                     |        | 62 → 65     | 0.20939 | $\pi \rightarrow \pi^*, n \rightarrow \pi^*$ |

|                       |                     |        |                     |         |                                              |
|-----------------------|---------------------|--------|---------------------|---------|----------------------------------------------|
| $S_0 \rightarrow T_1$ | 2.0122 eV/616.16 nm | 0.0000 | 63 $\rightarrow$ 66 | 0.25646 | $\pi \rightarrow \pi^*, n \rightarrow \pi^*$ |
|                       |                     |        | 63 $\rightarrow$ 64 | 0.69726 | $\pi \rightarrow \pi^*, n \rightarrow \pi^*$ |
| $S_0 \rightarrow T_2$ | 2.9517 eV/420.05 nm | 0.0000 | 64 $\rightarrow$ 63 | 0.12141 | $\pi^* \rightarrow \pi, \pi^* \rightarrow n$ |
|                       |                     |        | 58 $\rightarrow$ 66 | 0.10349 | $\pi \rightarrow \pi^*, n \rightarrow \pi^*$ |
|                       |                     |        | 62 $\rightarrow$ 64 | 0.61238 | $\pi \rightarrow \pi^*, n \rightarrow \pi^*$ |
| $S_0 \rightarrow T_3$ | 3.2743 eV/378.66 nm | 0.0000 | 63 $\rightarrow$ 65 | 0.26003 | $\pi \rightarrow \pi^*, n \rightarrow \pi^*$ |
|                       |                     |        | 63 $\rightarrow$ 66 | 0.10087 | $\pi \rightarrow \pi^*, n \rightarrow \pi^*$ |
|                       |                     |        | 56 $\rightarrow$ 64 | 0.29182 | $n \rightarrow \pi^*$                        |
|                       |                     |        | 60 $\rightarrow$ 64 | 0.54605 | $n \rightarrow \pi^*$                        |
| $S_0 \rightarrow T_4$ | 3.9121 eV/316.92 nm | 0.0000 | 61 $\rightarrow$ 64 | 0.27628 | $n \rightarrow \pi^*$                        |
|                       |                     |        | 58 $\rightarrow$ 64 | 0.18194 | $\pi \rightarrow \pi^*, n \rightarrow \pi^*$ |
|                       |                     |        | 58 $\rightarrow$ 66 | 0.10352 | $\pi \rightarrow \pi^*, n \rightarrow \pi^*$ |
|                       |                     |        | 59 $\rightarrow$ 64 | 0.11560 | $\pi \rightarrow \pi^*, n \rightarrow \pi^*$ |
|                       |                     |        | 62 $\rightarrow$ 64 | 0.28701 | $\pi \rightarrow \pi^*, n \rightarrow \pi^*$ |
|                       |                     |        | 62 $\rightarrow$ 65 | 0.16775 | $\pi \rightarrow \pi^*, n \rightarrow \pi^*$ |
|                       |                     |        | 63 $\rightarrow$ 65 | 0.52389 | $\pi \rightarrow \pi^*, n \rightarrow \pi^*$ |
|                       |                     |        | 63 $\rightarrow$ 66 | 0.10329 | $\pi \rightarrow \pi^*, n \rightarrow \pi^*$ |
|                       |                     |        | 58 $\rightarrow$ 64 | 0.51767 | $\pi \rightarrow \pi^*, n \rightarrow \pi^*$ |
| $S_0 \rightarrow T_5$ | 4.0594 eV/305.42 nm | 0.0000 | 58 $\rightarrow$ 65 | 0.12344 | $\pi \rightarrow \pi^*, n \rightarrow \pi^*$ |
|                       |                     |        | 58 $\rightarrow$ 66 | 0.13733 | $\pi \rightarrow \pi^*, n \rightarrow \pi^*$ |
|                       |                     |        | 62 $\rightarrow$ 66 | 0.16772 | $\pi \rightarrow \pi^*, n \rightarrow \pi^*$ |
|                       |                     |        | 63 $\rightarrow$ 65 | 0.26780 | $\pi \rightarrow \pi^*, n \rightarrow \pi^*$ |
|                       |                     |        | 63 $\rightarrow$ 66 | 0.24731 | $\pi \rightarrow \pi^*, n \rightarrow \pi^*$ |

---

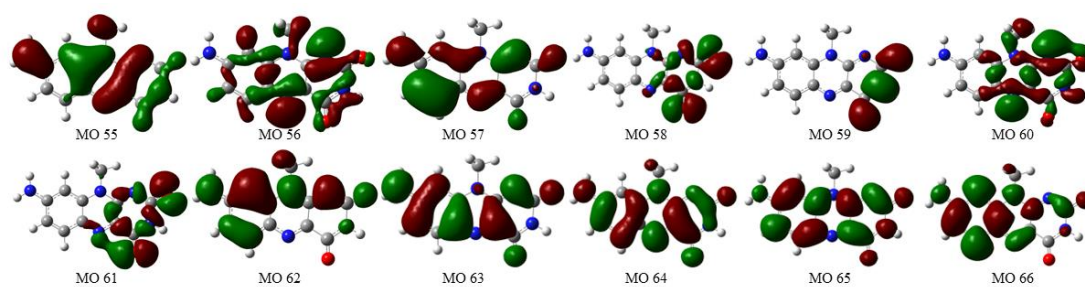

Figure S5. Isosurface plots of frontier molecular orbitals of 8AmFL involved in electron transitions contribute to UV-vis absorption. (Isovalue:  $\pm 0.02$  a.u.; C: Gray; O: Red; N: Blue; H: White.)

Table S6. Electronic transitions involved in the excitation of 9AmFL calculated at CAM-B3LYP/6-311G(d) level of theory.

|                                 | Energy              | f      | Composition | CI      | Character |
|---------------------------------|---------------------|--------|-------------|---------|-----------|
| S <sub>0</sub> →S <sub>1</sub>  | 3.1075 eV/398.99 nm | 0.0666 | 63 → 64     | 0.69645 | π→π*,n→π* |
| S <sub>0</sub> →S <sub>2</sub>  | 3.7058 eV/334.57 nm | 0.2258 | 55 → 64     | 0.11586 | n→π*      |
|                                 |                     |        | 60 → 64     | 0.24309 | n→π*      |
|                                 |                     |        | 61 → 64     | 0.35297 | n→π*      |
|                                 |                     |        | 62 → 64     | 0.52836 | π→π*,n→π* |
| S <sub>0</sub> →S <sub>3</sub>  | 3.7337 eV/332.07 nm | 0.1658 | 55 → 64     | 0.11856 | n→π*      |
|                                 |                     |        | 60 → 64     | 0.31136 | n→π*      |
|                                 |                     |        | 61 → 64     | 0.41117 | n→π*      |
|                                 |                     |        | 62 → 64     | 0.43983 | π→π*,n→π* |
| S <sub>0</sub> →S <sub>4</sub>  | 4.2475 eV/291.90 nm | 0.0012 | 58 → 64     | 0.27463 | n→π*      |
|                                 |                     |        | 58 → 67     | 0.10767 | n→π*      |
|                                 |                     |        | 60 → 64     | 0.49045 | n→π*      |
|                                 |                     |        | 61 → 64     | 0.35421 | n→π*      |
|                                 |                     |        | 61 → 67     | 0.12882 | n→π*      |
| S <sub>0</sub> →S <sub>5</sub>  | 4.6951 eV/264.07 nm | 0.4470 | 57 → 64     | 0.15711 | π→π*,n→π* |
|                                 |                     |        | 59 → 64     | 0.13781 | n→π*      |
|                                 |                     |        | 62 → 66     | 0.13877 | π→π*,n→π* |
|                                 |                     |        | 63 → 65     | 0.63550 | π→π*,n→π* |
| S <sub>0</sub> →S <sub>6</sub>  | 5.0743 eV/244.34 nm | 0.0006 | 55 → 64     | 0.27986 | n→π*      |
|                                 |                     |        | 56 → 64     | 0.12766 | π→π*,n→π* |
|                                 |                     |        | 58 → 64     | 0.47170 | n→π*      |
|                                 |                     |        | 60 → 64     | 0.22603 | n→π*      |
|                                 |                     |        | 60 → 65     | 0.21688 | n→π*      |
|                                 |                     |        | 60 → 69     | 0.11519 | n→π*      |
|                                 |                     |        | 61 → 64     | 0.11581 | n→π*      |
| S <sub>0</sub> →S <sub>7</sub>  | 5.1724 eV/239.71 nm | 0.0972 | 59 → 64     | 0.61288 | n→π*      |
|                                 |                     |        | 62 → 65     | 0.24247 | π→π*,n→π* |
|                                 |                     |        | 63 → 65     | 0.14090 | π→π*,n→π* |
| S <sub>0</sub> →S <sub>8</sub>  | 5.2054 eV/238.18 nm | 0.0039 | 55 → 64     | 0.47518 | n→π*      |
|                                 |                     |        | 56 → 64     | 0.17343 | π→π*,n→π* |
|                                 |                     |        | 58 → 64     | 0.28762 | n→π*      |
|                                 |                     |        | 60 → 65     | 0.14999 | n→π*      |
|                                 |                     |        | 61 → 64     | 0.14892 | n→π*      |
| S <sub>0</sub> →S <sub>9</sub>  | 5.4032 eV/229.46 nm | 0.2536 | 61 → 65     | 0.25042 | n→π*      |
|                                 |                     |        | 57 → 64     | 0.21505 | π→π*,n→π* |
|                                 |                     |        | 59 → 64     | 0.19342 | n→π*      |
|                                 |                     |        | 62 → 65     | 0.57361 | π→π*,n→π* |
|                                 |                     |        | 63 → 65     | 0.11863 | π→π*,n→π* |
| S <sub>0</sub> →S <sub>10</sub> | 5.7085 eV/217.19 nm | 0.0260 | 63 → 66     | 0.18176 | π→π*,n→π* |
|                                 |                     |        | 57 → 64     | 0.55911 | π→π*,n→π* |
|                                 |                     |        | 59 → 64     | 0.15976 | n→π*      |

|                       |                     |        |         |         |                                              |
|-----------------------|---------------------|--------|---------|---------|----------------------------------------------|
|                       |                     |        | 63 → 65 | 0.11443 | $\pi \rightarrow \pi^*, n \rightarrow \pi^*$ |
|                       |                     |        | 63 → 66 | 0.31698 | $\pi \rightarrow \pi^*, n \rightarrow \pi^*$ |
| $S_0 \rightarrow T_1$ | 2.2039 eV/562.56 nm | 0.0000 | 62 → 64 | 0.22565 | $\pi \rightarrow \pi^*, n \rightarrow \pi^*$ |
|                       |                     |        | 63 → 64 | 0.64860 | $\pi \rightarrow \pi^*, n \rightarrow \pi^*$ |
| $S_0 \rightarrow T_2$ | 2.3871 eV/519.39 nm | 0.0000 | 56 → 64 | 0.15134 | $\pi \rightarrow \pi^*, n \rightarrow \pi^*$ |
|                       |                     |        | 62 → 64 | 0.61571 | $\pi \rightarrow \pi^*, n \rightarrow \pi^*$ |
|                       |                     |        | 62 → 65 | 0.10044 | $\pi \rightarrow \pi^*, n \rightarrow \pi^*$ |
|                       |                     |        | 63 → 64 | 0.17490 | $\pi \rightarrow \pi^*, n \rightarrow \pi^*$ |
|                       |                     |        | 63 → 66 | 0.18737 | $\pi \rightarrow \pi^*, n \rightarrow \pi^*$ |
| $S_0 \rightarrow T_3$ | 3.1181 eV/397.63 nm | 0.0000 | 64 → 62 | 0.10033 | $^*\pi \rightarrow \pi, \pi^* \rightarrow n$ |
|                       |                     |        | 55 → 64 | 0.25875 | $n \rightarrow \pi^*$                        |
|                       |                     |        | 60 → 64 | 0.38599 | $n \rightarrow \pi^*$                        |
| $S_0 \rightarrow T_4$ | 3.5479 eV/349.45 nm | 0.0000 | 61 → 64 | 0.49090 | $n \rightarrow \pi^*$                        |
|                       |                     |        | 57 → 64 | 0.13092 | $\pi \rightarrow \pi^*, n \rightarrow \pi^*$ |
|                       |                     |        | 62 → 64 | 0.13027 | $\pi \rightarrow \pi^*, n \rightarrow \pi^*$ |
|                       |                     |        | 62 → 65 | 0.21296 | $\pi \rightarrow \pi^*, n \rightarrow \pi^*$ |
|                       |                     |        | 62 → 66 | 0.10040 | $\pi \rightarrow \pi^*, n \rightarrow \pi^*$ |
|                       |                     |        | 63 → 64 | 0.10401 | $\pi \rightarrow \pi^*, n \rightarrow \pi^*$ |
|                       |                     |        | 63 → 65 | 0.56751 | $\pi \rightarrow \pi^*, n \rightarrow \pi^*$ |
| $S_0 \rightarrow T_5$ | 3.9124 eV/316.90 nm | 0.0000 | 63 → 66 | 0.18742 | $\pi \rightarrow \pi^*, n \rightarrow \pi^*$ |
|                       |                     |        | 58 → 64 | 0.29835 | $n \rightarrow \pi^*$                        |
|                       |                     |        | 58 → 67 | 0.14409 | $n \rightarrow \pi^*$                        |
|                       |                     |        | 60 → 64 | 0.42652 | $n \rightarrow \pi^*$                        |
|                       |                     |        | 61 → 64 | 0.37037 | $n \rightarrow \pi^*$                        |
|                       |                     |        | 61 → 67 | 0.16338 | $n \rightarrow \pi^*$                        |

---

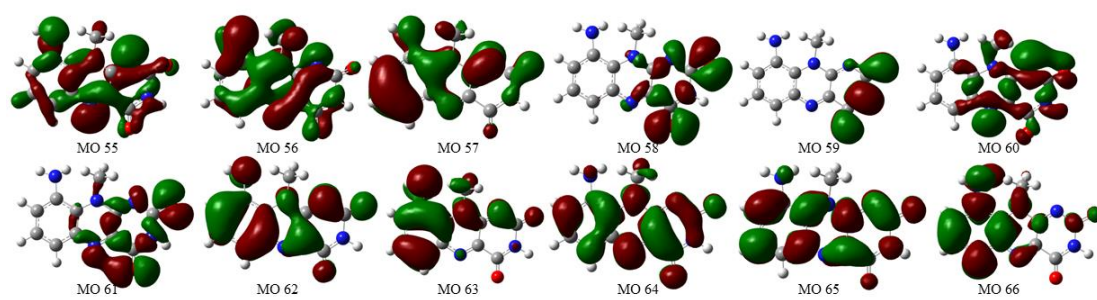

Figure S6. Isosurface plots of frontier molecular orbitals of 9AmFL involved in electron transitions contribute to UV-vis absorption. (Isovalue:  $\pm 0.02$  a.u.; C: Gray; O: Red; N: Blue; H: White.)

Table S7. Electronic transitions involved in the excitation of 8Am7MeFL.

|                                 | Energy              | f      | Composition | CI      | Character                                    |
|---------------------------------|---------------------|--------|-------------|---------|----------------------------------------------|
| S <sub>0</sub> →S <sub>1</sub>  | 3.2394 eV/382.74 nm | 0.7426 | 67 → 68     | 0.69302 | $\pi \rightarrow \pi^*, n \rightarrow \pi^*$ |
| S <sub>0</sub> →S <sub>2</sub>  | 3.8912 eV/318.63 nm | 0.0297 | 66 → 68     | 0.68722 | $\pi \rightarrow \pi^*, n \rightarrow \pi^*$ |
| S <sub>0</sub> →S <sub>3</sub>  | 3.9185 eV/316.41 nm | 0.0015 | 60 → 64     | 0.19612 | $n \rightarrow \pi^*$                        |
|                                 |                     |        | 64 → 68     | 0.58287 | $n \rightarrow \pi^*$                        |
|                                 |                     |        | 65 → 68     | 0.31665 | $n \rightarrow \pi^*$                        |
| S <sub>0</sub> →S <sub>4</sub>  | 4.4177 eV/280.66 nm | 0.0000 | 61 → 68     | 0.26579 | $n \rightarrow \pi^*$                        |
|                                 |                     |        | 61 → 71     | 0.10537 | $n \rightarrow \pi^*$                        |
|                                 |                     |        | 64 → 68     | 0.28491 | $n \rightarrow \pi^*$                        |
|                                 |                     |        | 65 → 68     | 0.53372 | $n \rightarrow \pi^*$                        |
|                                 |                     |        | 65 → 71     | 0.15617 | $n \rightarrow \pi^*$                        |
| S <sub>0</sub> →S <sub>5</sub>  | 4.8673 eV/254.73 nm | 0.1409 | 62 → 68     | 0.16255 | $\pi \rightarrow \pi^*, n \rightarrow \pi^*$ |
|                                 |                     |        | 66 → 68     | 0.13068 | $\pi \rightarrow \pi^*, n \rightarrow \pi^*$ |
|                                 |                     |        | 67 → 69     | 0.63163 | $\pi \rightarrow \pi^*, n \rightarrow \pi^*$ |
|                                 |                     |        | 67 → 70     | 0.15890 | $\pi \rightarrow \pi^*, n \rightarrow \pi^*$ |
| S <sub>0</sub> →S <sub>6</sub>  | 5.1173 eV/242.28 nm | 0.0874 | 59 → 67     | 0.10201 | $n \rightarrow \pi^*$                        |
|                                 |                     |        | 62 → 68     | 0.49994 | $\pi \rightarrow \pi^*, n \rightarrow \pi^*$ |
|                                 |                     |        | 63 → 68     | 0.22655 | $\pi \rightarrow \pi^*, n \rightarrow \pi^*$ |
|                                 |                     |        | 66 → 69     | 0.30017 | $\pi \rightarrow \pi^*, n \rightarrow \pi^*$ |
|                                 |                     |        | 67 → 69     | 0.16900 | $\pi \rightarrow \pi^*, n \rightarrow \pi^*$ |
|                                 |                     |        | 67 → 70     | 0.22156 | $\pi \rightarrow \pi^*, n \rightarrow \pi^*$ |
| S <sub>0</sub> →S <sub>7</sub>  | 5.2400 eV/236.61 nm | 0.0000 | 60 → 68     | 0.30609 | $n \rightarrow \pi^*$                        |
|                                 |                     |        | 61 → 68     | 0.45961 | $n \rightarrow \pi^*$                        |
|                                 |                     |        | 61 → 71     | 0.10333 | $n \rightarrow \pi^*$                        |
|                                 |                     |        | 64 → 68     | 0.17308 | $n \rightarrow \pi^*$                        |
|                                 |                     |        | 64 → 69     | 0.18842 | $n \rightarrow \pi^*$                        |
|                                 |                     |        | 65 → 68     | 0.18101 | $n \rightarrow \pi^*$                        |
|                                 |                     |        | 65 → 69     | 0.16991 | $n \rightarrow \pi^*$                        |
|                                 |                     |        | 65 → 74     | 0.10580 | $n \rightarrow \pi^*$                        |
| S <sub>0</sub> →S <sub>8</sub>  | 5.3768 eV/230.59 nm | 0.0001 | 60 → 68     | 0.48435 | $n \rightarrow \pi^*$                        |
|                                 |                     |        | 61 → 68     | 0.28348 | $n \rightarrow \pi^*$                        |
|                                 |                     |        | 64 → 69     | 0.24410 | $n \rightarrow \pi^*$                        |
|                                 |                     |        | 65 → 68     | 0.14261 | $n \rightarrow \pi^*$                        |
|                                 |                     |        | 65 → 69     | 0.19491 | $n \rightarrow \pi^*$                        |
| S <sub>0</sub> →S <sub>9</sub>  | 5.4774 eV/226.35 nm | 0.3441 | 63 → 68     | 0.56216 | $\pi \rightarrow \pi^*, n \rightarrow \pi^*$ |
|                                 |                     |        | 66 → 69     | 0.26574 | $\pi \rightarrow \pi^*, n \rightarrow \pi^*$ |
|                                 |                     |        | 67 → 69     | 0.16034 | $\pi \rightarrow \pi^*, n \rightarrow \pi^*$ |
|                                 |                     |        | 67 → 70     | 0.24913 | $\pi \rightarrow \pi^*, n \rightarrow \pi^*$ |
| S <sub>0</sub> →S <sub>10</sub> | 5.5531 eV/223.27 nm | 0.1288 | 62 → 68     | 0.43762 | $\pi \rightarrow \pi^*, n \rightarrow \pi^*$ |
|                                 |                     |        | 63 → 68     | 0.31815 | $\pi \rightarrow \pi^*, n \rightarrow \pi^*$ |
|                                 |                     |        | 66 → 69     | 0.27523 | $\pi \rightarrow \pi^*, n \rightarrow \pi^*$ |
|                                 |                     |        | 67 → 70     | 0.32113 | $\pi \rightarrow \pi^*, n \rightarrow \pi^*$ |
| S <sub>0</sub> →T <sub>1</sub>  | 1.9839 eV/624.94 nm | 0.0000 | 67 → 68     | 0.69850 | $\pi \rightarrow \pi^*, n \rightarrow \pi^*$ |



|                       |                     |        |                     |         |                                              |
|-----------------------|---------------------|--------|---------------------|---------|----------------------------------------------|
| $S_0 \rightarrow T_2$ | 2.8987 eV/427.73 nm | 0.0000 | 68 $\rightarrow$ 67 | 0.12287 | $n \rightarrow \pi^*$                        |
|                       |                     |        | 62 $\rightarrow$ 70 | 0.10113 | $\pi \rightarrow \pi^*, n \rightarrow \pi^*$ |
|                       |                     |        | 66 $\rightarrow$ 68 | 0.61584 | $\pi \rightarrow \pi^*, n \rightarrow \pi^*$ |
| $S_0 \rightarrow T_3$ | 3.2816 eV/377.81 nm | 0.0000 | 67 $\rightarrow$ 69 | 0.25800 | $\pi \rightarrow \pi^*, n \rightarrow \pi^*$ |
|                       |                     |        | 60 $\rightarrow$ 68 | 0.29231 | $n \rightarrow \pi^*$                        |
|                       |                     |        | 64 $\rightarrow$ 68 | 0.54913 | $n \rightarrow \pi^*$                        |
| $S_0 \rightarrow T_4$ | 3.8974 eV/318.12 nm | 0.0000 | 65 $\rightarrow$ 68 | 0.26873 | $n \rightarrow \pi^*$                        |
|                       |                     |        | 62 $\rightarrow$ 68 | 0.23531 | $\pi \rightarrow \pi^*, n \rightarrow \pi^*$ |
|                       |                     |        | 62 $\rightarrow$ 70 | 0.10237 | $\pi \rightarrow \pi^*, n \rightarrow \pi^*$ |
|                       |                     |        | 66 $\rightarrow$ 68 | 0.28422 | $\pi \rightarrow \pi^*, n \rightarrow \pi^*$ |
|                       |                     |        | 66 $\rightarrow$ 69 | 0.17293 | $\pi \rightarrow \pi^*, n \rightarrow \pi^*$ |
| $S_0 \rightarrow T_5$ | 3.9636 eV/312.81 nm | 0.0000 | 67 $\rightarrow$ 69 | 0.50161 | $\pi \rightarrow \pi^*, n \rightarrow \pi^*$ |
|                       |                     |        | 67 $\rightarrow$ 70 | 0.12086 | $\pi \rightarrow \pi^*, n \rightarrow \pi^*$ |
|                       |                     |        | 62 $\rightarrow$ 68 | 0.48205 | $\pi \rightarrow \pi^*, n \rightarrow \pi^*$ |
|                       |                     |        | 62 $\rightarrow$ 70 | 0.10435 | $\pi \rightarrow \pi^*, n \rightarrow \pi^*$ |
|                       |                     |        | 63 $\rightarrow$ 68 | 0.17881 | $\pi \rightarrow \pi^*, n \rightarrow \pi^*$ |
|                       |                     |        | 66 $\rightarrow$ 70 | 0.13349 | $\pi \rightarrow \pi^*, n \rightarrow \pi^*$ |
|                       |                     |        | 67 $\rightarrow$ 69 | 0.29784 | $\pi \rightarrow \pi^*, n \rightarrow \pi^*$ |
|                       |                     |        | 67 $\rightarrow$ 70 | 0.26983 | $\pi \rightarrow \pi^*, n \rightarrow \pi^*$ |

---

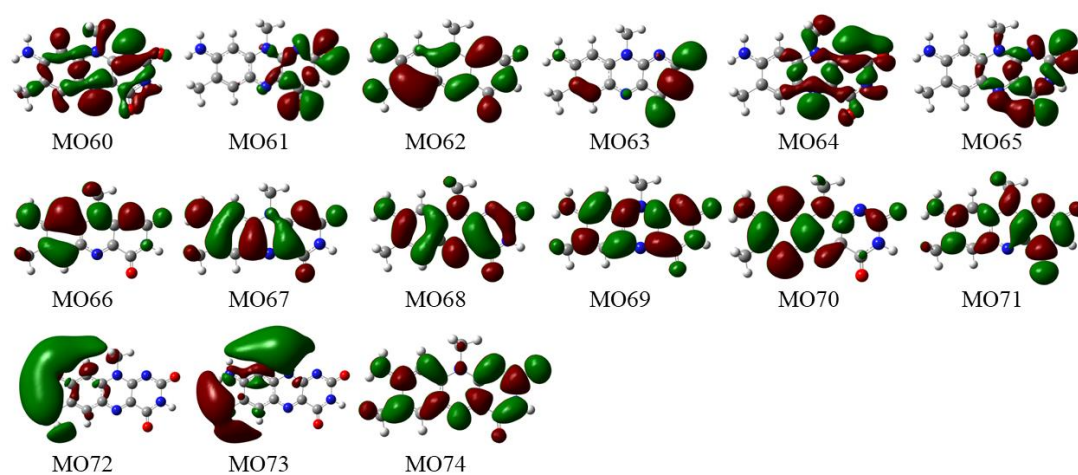

Figure S7. Isosurface plots of frontier molecular orbitals of 8Am7MeFL involved in electron transitions contribute to UV-vis absorption. (Isovalue:  $\pm 0.02$  a.u.; C: Gray; O: Red; N: Blue; H: White.)

Table S8. Electronic transitions involved in the excitation of 7Am8MeFL calculated at CAM-B3LYP/6-311G(d) level of theory.

|                                 | Energy              | f      | Composition | CI      | Character |
|---------------------------------|---------------------|--------|-------------|---------|-----------|
| S <sub>0</sub> →S <sub>1</sub>  | 2.9050 eV/426.80 nm | 0.2778 | 67 → 68     | 0.69895 | π→π*,n→π* |
| S <sub>0</sub> →S <sub>2</sub>  | 3.7526 eV/330.39 nm | 0.0014 | 60 → 68     | 0.18628 | n→π*      |
|                                 |                     |        | 63 → 68     | 0.50376 | n→π*      |
|                                 |                     |        | 65 → 68     | 0.43318 | n→π*      |
| S <sub>0</sub> →S <sub>3</sub>  | 4.0391 eV/306.96 nm | 0.2804 | 66 → 68     | 0.68749 | π→π*,n→π* |
|                                 |                     |        | 67 → 69     | 0.12427 | π→π*,n→π* |
| S <sub>0</sub> →S <sub>4</sub>  | 4.0391 eV/306.96 nm | 0.0000 | 61 → 68     | 0.28663 | n→π*      |
|                                 |                     |        | 63 → 68     | 0.38686 | n→π*      |
|                                 |                     |        | 65 → 68     | 0.45140 | n→π*      |
|                                 |                     |        | 65 → 71     | 0.12996 | n→π*      |
| S <sub>0</sub> →S <sub>5</sub>  | 4.6929 eV/264.20 nm | 0.1595 | 62 → 68     | 0.21543 | n→π*      |
|                                 |                     |        | 64 → 68     | 0.45835 | π→π*,n→π* |
|                                 |                     |        | 67 → 69     | 0.44905 | π→π*,n→π* |
| S <sub>0</sub> →S <sub>6</sub>  | 5.0509 eV/245.47 nm | 0.7359 | 67 → 70     | 0.10357 | π→π*,n→π* |
|                                 |                     |        | 64 → 68     | 0.47235 | π→π*,n→π* |
|                                 |                     |        | 66 → 68     | 0.10188 | π→π*,n→π* |
| S <sub>0</sub> →S <sub>7</sub>  | 5.1198 eV/242.17 nm | 0.0027 | 67 → 69     | 0.47971 | π→π*,n→π* |
|                                 |                     |        | 60 → 68     | 0.33485 | n→π*      |
|                                 |                     |        | 61 → 68     | 0.45288 | n→π*      |
|                                 |                     |        | 63 → 68     | 0.21108 | n→π*      |
|                                 |                     |        | 63 → 69     | 0.20513 | n→π*      |
| S <sub>0</sub> →S <sub>8</sub>  | 5.2396 eV/236.63 nm | 0.0022 | 65 → 68     | 0.16196 | n→π*      |
|                                 |                     |        | 65 → 69     | 0.12019 | n→π*      |
|                                 |                     |        | 60 → 68     | 0.49403 | n→π*      |
|                                 |                     |        | 61 → 68     | 0.31296 | n→π*      |
|                                 |                     |        | 63 → 69     | 0.17399 | n→π*      |
| S <sub>0</sub> →S <sub>9</sub>  | 5.2507 eV/236.13 nm | 0.1295 | 65 → 68     | 0.17003 | n→π*      |
|                                 |                     |        | 65 → 69     | 0.21627 | n→π*      |
|                                 |                     |        | 62 → 68     | 0.59858 | n→π*      |
|                                 |                     |        | 66 → 69     | 0.13088 | π→π*,n→π* |
| S <sub>0</sub> →S <sub>10</sub> | 5.3186 eV/233.11 nm | 0.1069 | 67 → 69     | 0.12453 | π→π*,n→π* |
|                                 |                     |        | 67 → 70     | 0.27105 | π→π*,n→π* |
|                                 |                     |        | 62 → 68     | 0.26120 | n→π*      |
|                                 |                     |        | 64 → 68     | 0.17903 | π→π*,n→π* |
| S <sub>0</sub> →T <sub>1</sub>  | 1.8853 eV/657.63 nm | 0.0000 | 66 → 69     | 0.16686 | π→π*,n→π* |
|                                 |                     |        | 67 → 70     | 0.57875 | π→π*,n→π* |
|                                 |                     |        | 66 → 68     | 0.14033 | π→π*,n→π* |
| S <sub>0</sub> →T <sub>2</sub>  | 1.8853 eV/657.63 nm | 0.0000 | 67 → 68     | 0.68334 | π→π*,n→π* |
|                                 |                     |        | 68 → 67     | 0.10402 | π*→π,π*→n |
|                                 |                     |        | 58 → 68     | 0.11472 | π→π*,n→π* |
|                                 |                     |        | 64 → 68     | 0.12589 | π→π*,n→π* |

|                       |                     |        |         |         |                                              |
|-----------------------|---------------------|--------|---------|---------|----------------------------------------------|
|                       |                     |        | 66 → 68 | 0.58757 | $\pi \rightarrow \pi^*, n \rightarrow \pi^*$ |
|                       |                     |        | 66 → 70 | 0.16030 | $\pi \rightarrow \pi^*, n \rightarrow \pi^*$ |
|                       |                     |        | 67 → 68 | 0.10852 | $\pi \rightarrow \pi^*, n \rightarrow \pi^*$ |
|                       |                     |        | 67 → 69 | 0.20645 | $\pi \rightarrow \pi^*, n \rightarrow \pi^*$ |
|                       |                     |        | 67 → 70 | 0.14078 | $\pi \rightarrow \pi^*, n \rightarrow \pi^*$ |
| $S_0 \rightarrow T_3$ | 1.8853 eV/657.63 nm | 0.0000 | 60 → 68 | 0.28120 | $n \rightarrow \pi^*$                        |
|                       |                     |        | 63 → 68 | 0.48021 | $n \rightarrow \pi^*$                        |
|                       |                     |        | 65 → 68 | 0.38413 | $n \rightarrow \pi^*$                        |
| $S_0 \rightarrow T_4$ | 1.8853 eV/657.63 nm | 0.0000 | 64 → 68 | 0.33331 | $\pi \rightarrow \pi^*, n \rightarrow \pi^*$ |
|                       |                     |        | 66 → 68 | 0.24611 | $\pi \rightarrow \pi^*, n \rightarrow \pi^*$ |
|                       |                     |        | 67 → 69 | 0.51119 | $\pi \rightarrow \pi^*, n \rightarrow \pi^*$ |
|                       |                     |        | 67 → 70 | 0.12543 | $\pi \rightarrow \pi^*, n \rightarrow \pi^*$ |
| $S_0 \rightarrow T_5$ | 1.8853 eV/657.63 nm | 0.0000 | 64 → 68 | 0.37677 | $\pi \rightarrow \pi^*, n \rightarrow \pi^*$ |
|                       |                     |        | 66 → 68 | 0.13888 | $\pi \rightarrow \pi^*, n \rightarrow \pi^*$ |
|                       |                     |        | 67 → 69 | 0.27358 | $\pi \rightarrow \pi^*, n \rightarrow \pi^*$ |
|                       |                     |        | 67 → 70 | 0.41591 | $\pi \rightarrow \pi^*, n \rightarrow \pi^*$ |
|                       |                     |        | 67 → 71 | 0.17185 | $\pi \rightarrow \pi^*, n \rightarrow \pi^*$ |
|                       |                     |        | 67 → 74 | 0.10022 | $\pi \rightarrow \pi^*, n \rightarrow \pi^*$ |

---

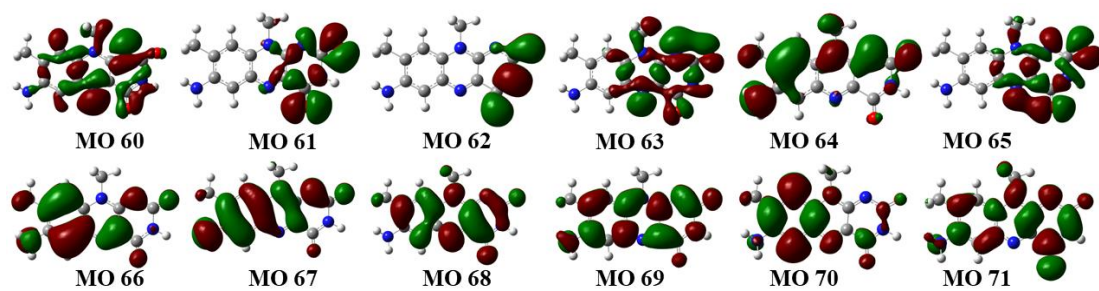

Figure S8. Isosurface plots of frontier molecular orbitals of 7Am8MeFL involved in electron transitions contribute to UV-vis absorption. (Isovalue:  $\pm 0.02$  a.u.; C: Gray; O: Red; N: Blue; H: White.)

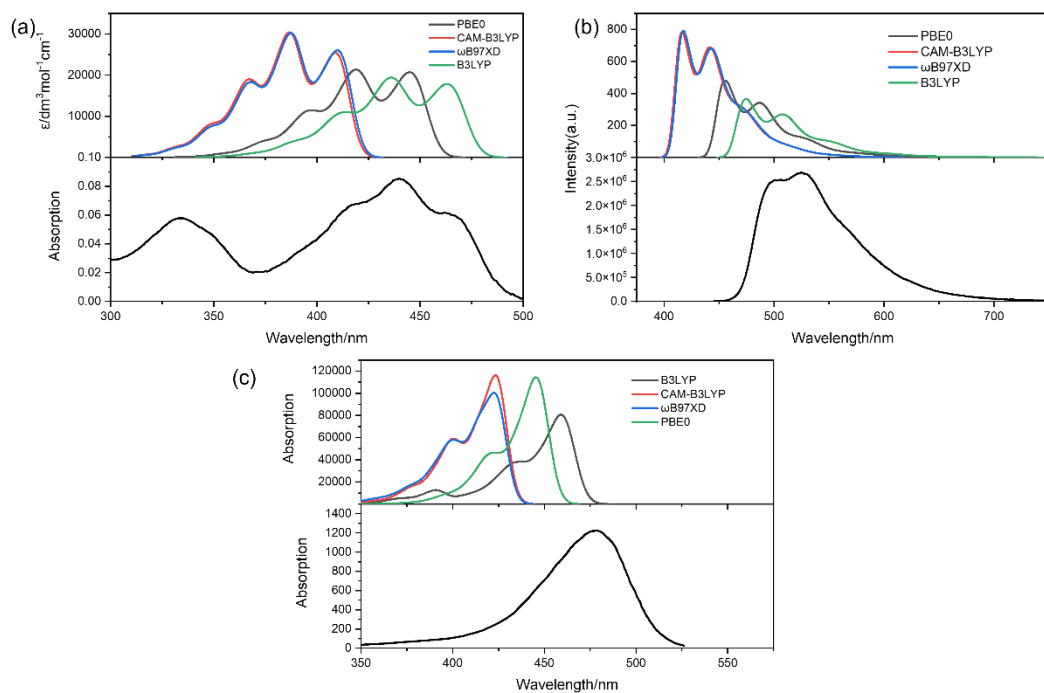

Figure S9. Comparison of calculated and experimental absorption spectra of FL(a), calculated and experimental fluorescent spectra of FL(b) and calculated and experimental spectra of 8Am7MeFL(c).

Table S9. Fluorescent properties of AmFLs investigated at TD-DFT/CAM-B3LYP /6-311g(d) level of theory

| AmFL     | Energy         | f      | Composition  | CI      | Character                                    |
|----------|----------------|--------|--------------|---------|----------------------------------------------|
| FL       | 2.85 eV/435 nm | 0.3911 | MO 59 →MO 60 | 0.70193 | $\pi \rightarrow \pi^*, n \rightarrow \pi^*$ |
| 9AmFL    | 2.09 eV/593 nm | 0.0401 | MO 63 →MO 64 | 0.70520 | $\pi \rightarrow \pi^*, n \rightarrow \pi^*$ |
| 8AmFL    | 2.91 eV/425 nm | 0.8829 | MO 63 →MO 64 | 0.69777 | $\pi \rightarrow \pi^*, n \rightarrow \pi^*$ |
| 7AmFL    | 2.20 eV/564 nm | 0.2428 | MO 63 →MO 64 | 0.70366 | $\pi \rightarrow \pi^*, n \rightarrow \pi^*$ |
| 6AmFL    | 2.39 eV/518 nm | 0.1785 | MO 63 →MO 64 | 0.70411 | $\pi \rightarrow \pi^*, n \rightarrow \pi^*$ |
| 8Am7MeFL | 2.88 eV/430 nm | 0.8879 | MO 67 →MO 68 | 0.69808 | $\pi \rightarrow \pi^*, n \rightarrow \pi^*$ |

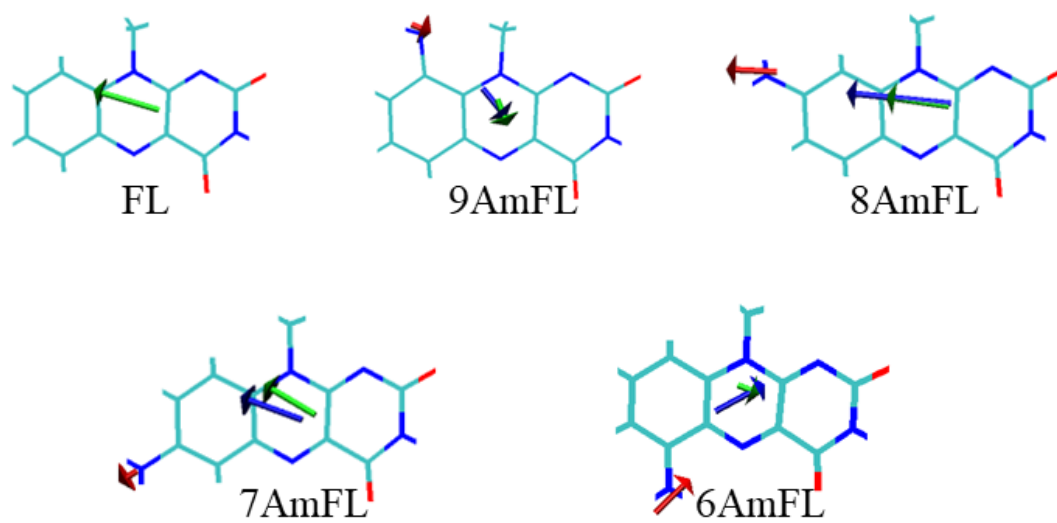

Figure S10. Contribution of -NH<sub>2</sub> (red) and isoalloxazine moiety (green) to  $\mu(S_0 \rightarrow S_1)$  of FL, 9AmFL, 8AmFL, 7AmFL and 6AmFL (blue).



Table S10. Contribution of -NH<sub>2</sub> and isoalloxazine moiety to  $\mu(S_0 \rightarrow S_1)$  of FL, 9AmFL, 8AmFL, 7AmFL and 6AmFL.

| Mol   | $ \mu(S_0 \rightarrow S_1) ^a$<br>(a.u.) | Contribution of<br>isoalloxazine to<br>$ \mu(S_0 \rightarrow S_1) $ (a.u.) | Contribution of -<br>NH <sub>2</sub> to $ \mu(S_0 \rightarrow S_1) $<br>(a.u.) |
|-------|------------------------------------------|----------------------------------------------------------------------------|--------------------------------------------------------------------------------|
| FL    | 2.01                                     | —                                                                          | —                                                                              |
| 9AmFL | 0.93                                     | 0.62                                                                       | 0.40                                                                           |
| 8AmFL | 3.01                                     | 1.72                                                                       | 1.30                                                                           |
| 7AmFL | 1.79                                     | 1.59                                                                       | 0.36                                                                           |
| 6AmFL | 1.51                                     | 0.46                                                                       | 1.26                                                                           |

<sup>a</sup> The transition dipole moments were calculated as vectors, they were projected to calculate the contribution of -NH<sub>2</sub> and isoalloxazine moieties. For clearance, only  $|\mu|$  was presented.

Table S11. Hole-electron analysis of excited states of AmFLs performed at CAM-B3LYP/6-311g(d) level of theory with Multiwfn.

| AmFL                     | D/Å <sup>a</sup> | S <sub>r</sub> /a.u. <sup>b</sup> | H/Å <sup>c</sup> | t/Å <sup>d</sup> | HDI <sup>e</sup> | EDI <sup>f</sup> |
|--------------------------|------------------|-----------------------------------|------------------|------------------|------------------|------------------|
| FL: S <sub>1</sub>       | 0.86             | 0.71                              | 2.67             | -0.40            | 9.04             | 9.14             |
| FL: S <sub>2</sub>       | 2.27             | 0.42                              | 2.24             | 0.70             | 22.62            | 10.08            |
| FL: T <sub>1</sub>       | 0.47             | 0.78                              | 2.61             | -0.86            | 8.60             | 9.27             |
| FL: T <sub>2</sub>       | 0.81             | 0.88                              | 2.57             | -1.17            | 7.89             | 7.49             |
| FL: T <sub>3</sub>       | 0.36             | 0.57                              | 2.07             | -0.98            | 17.50            | 11.44            |
| 9AmFL: S <sub>1</sub>    | 1.88             | 0.64                              | 2.58             | 0.01             | 8.60             | 9.19             |
| 9AmFL: T <sub>1</sub>    | 1.16             | 0.72                              | 2.64             | -0.63            | 8.55             | 8.60             |
| 9AmFL: T <sub>2</sub>    | 0.63             | 0.83                              | 2.66             | -1.54            | 7.65             | 8.28             |
| 8AmFL: S <sub>1</sub>    | 0.67             | 0.75                              | 2.88             | -1.56            | 8.13             | 9.15             |
| 8AmFL: S <sub>2</sub>    | 1.95             | 0.61                              | 2.52             | 0.11             | 9.84             | 9.57             |
| 8AmFL: T <sub>1</sub>    | 0.50             | 0.75                              | 2.82             | -1.61            | 8.18             | 9.39             |
| 8AmFL: T <sub>2</sub>    | 0.91             | 0.79                              | 2.76             | -0.77            | 8.95             | 7.72             |
| 8AmFL: T <sub>3</sub>    | 0.49             | 0.57                              | 2.11             | -0.90            | 18.00            | 11.58            |
| 7AmFL: S <sub>1</sub>    | 1.37             | 0.70                              | 2.84             | -0.97            | 8.17             | 8.87             |
| 7AmFL: T <sub>1</sub>    | 0.75             | 0.75                              | 2.82             | -1.39            | 7.78             | 8.69             |
| 6AmFL: S <sub>1</sub>    | 2.10             | 0.57                              | 2.41             | 0.45             | 9.90             | 9.26             |
| 6AmFL: T <sub>1</sub>    | 0.71             | 0.75                              | 2.56             | -1.29            | 8.47             | 9.23             |
| 6AmFL: T <sub>2</sub>    | 0.79             | 0.71                              | 2.75             | -0.78            | 8.64             | 8.61             |
| 8Am7MeFL: S <sub>1</sub> | 0.61             | 0.75                              | 2.90             | -1.48            | 8.01             | 9.12             |
| 8Am7MeFL: T <sub>1</sub> | 0.48             | 0.75                              | 2.84             | -1.52            | 8.05             | 9.34             |
| 8Am7MeFL: T <sub>2</sub> | 0.90             | 0.80                              | 2.78             | -0.83            | 8.59             | 7.67             |
| 7Am8MeFL: S <sub>1</sub> | 1.29             | 0.71                              | 2.87             | -1.11            | 8.00             | 8.96             |
| 7Am8MeFL: T <sub>1</sub> | 0.73             | 0.76                              | 2.85             | -1.55            | 7.64             | 8.78             |

<sup>a</sup>. The distance between centroids of hole and electron. <sup>b</sup>. The overlap between hole and electron, calculated as  $\int \sqrt{\rho^{hole}(\mathbf{r})\rho^{ele}(\mathbf{r})} d\mathbf{r}$ , where  $\rho^{hole}(\mathbf{r})$  and  $\rho^{ele}(\mathbf{r})$  are the density distribution of hole and electron, respectively. <sup>c</sup>. Averaged root mean square derivation of spatial extension of hole and electron distribution, calculated as  $H = (|\sigma_{ele}| + |\sigma_{hole}|)/2$ , where  $|\sigma_{ele}|$  and  $|\sigma_{hole}|$  measure the overall root mean square derivation of electron and hole, respectively. <sup>d</sup>. The degree of separation of hole and electron in the direction of charge transfer, calculated as  $t = D - H_{CT}$ , where  $D$  is the distance between centroids of hole and electron, and  $H_{CT}$  is the averaged degree of spatial extension of hole and electron distribution in CT direction. <sup>e</sup>. The hole delocalization index, calculated as  $100 \times \sqrt{\int [\rho^{hole}(\mathbf{r})]^2 d\mathbf{r}}$ . <sup>f</sup>. The electron delocalization index, calculated as  $100 \times \sqrt{\int [\rho^{ele}(\mathbf{r})]^2 d\mathbf{r}}$ .

Table S12. Isosurface plots of charge density difference (CDD) and hole-electron (h-e) plots of excited states of AmFLs performed at CAM-B3LYP/6-311g(d) level of theory (Isovalue:  $\pm 0.002$  a.u.).

| States         |     | FL                                                                                  | 9AmFL                                                                               | 8AmFL                                                                               | 7AmFL                                                                                | 6AmFL                                                                                 | 7Am8MeFL                                                                              | 8Am7MeFL                                                                              |
|----------------|-----|-------------------------------------------------------------------------------------|-------------------------------------------------------------------------------------|-------------------------------------------------------------------------------------|--------------------------------------------------------------------------------------|---------------------------------------------------------------------------------------|---------------------------------------------------------------------------------------|---------------------------------------------------------------------------------------|
| S <sub>1</sub> | CDD | 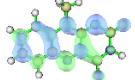   |    |    |    |    |    |    |
|                | h-e |    |    |    |    |    |    |    |
| S <sub>2</sub> | CDD |    |                                                                                     |    |                                                                                      |                                                                                       |                                                                                       |                                                                                       |
|                | h-e |    |                                                                                     |    |                                                                                      |                                                                                       |                                                                                       |                                                                                       |
| T <sub>1</sub> | CDD |    |    |    |    |    |    |    |
|                | h-e |  |  |  |  |  |  |  |
| T <sub>2</sub> | CDD |  |  |  |                                                                                      |  |                                                                                       |  |

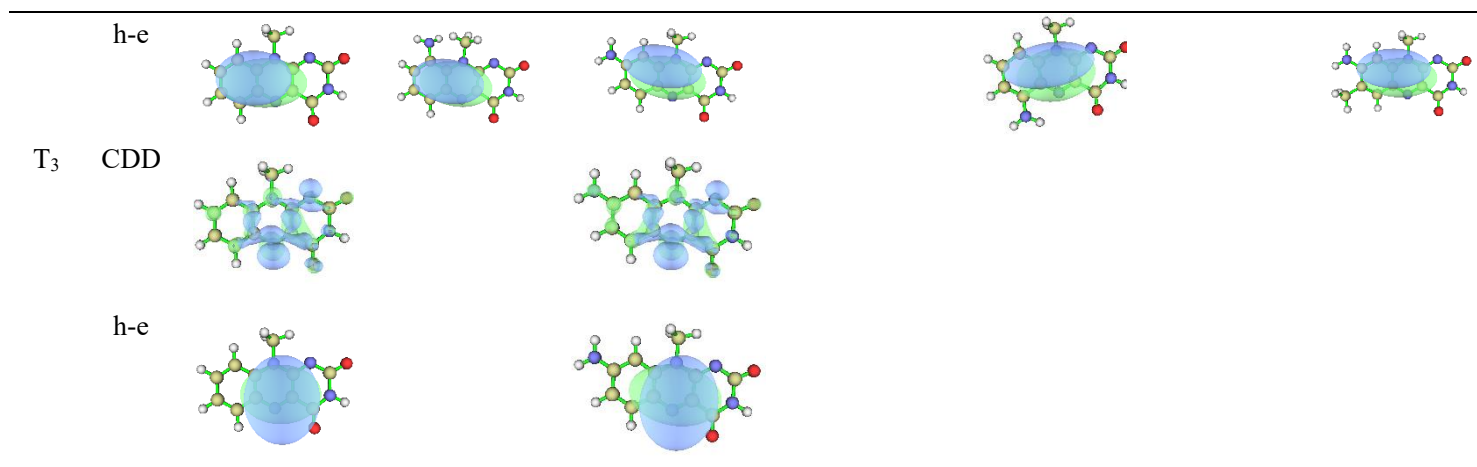

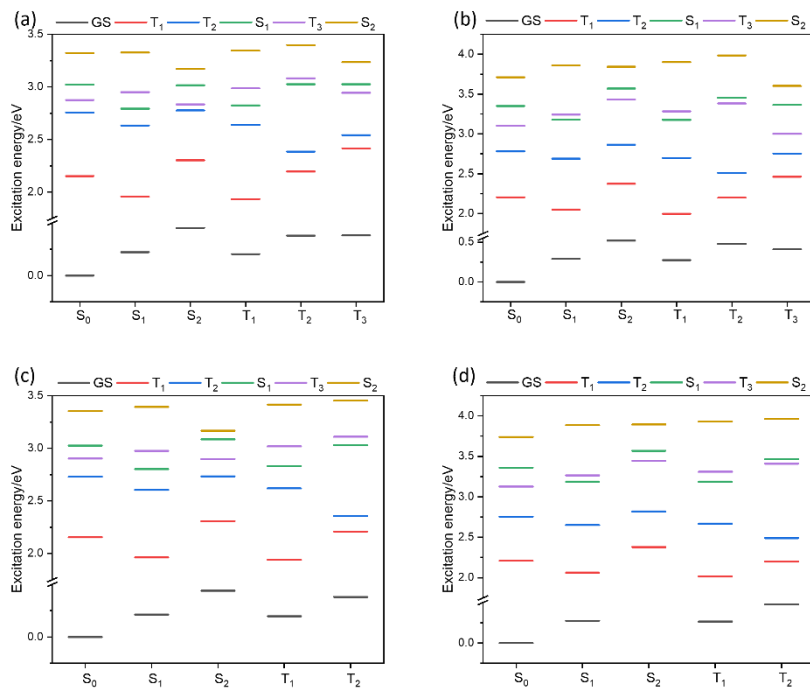

Figure S11. Vertical excitation energy of FL in DCM (a,b) and water(c,d) calculated with B3LYP(a,c) and CAM-B3LYP (b,d) functional at  $S_0$ ,  $S_1$ ,  $S_2$ ,  $T_1$ ,  $T_2$  and  $T_3$  minimum geometry obtained at B3LYP/6-311g(d) level of theory.

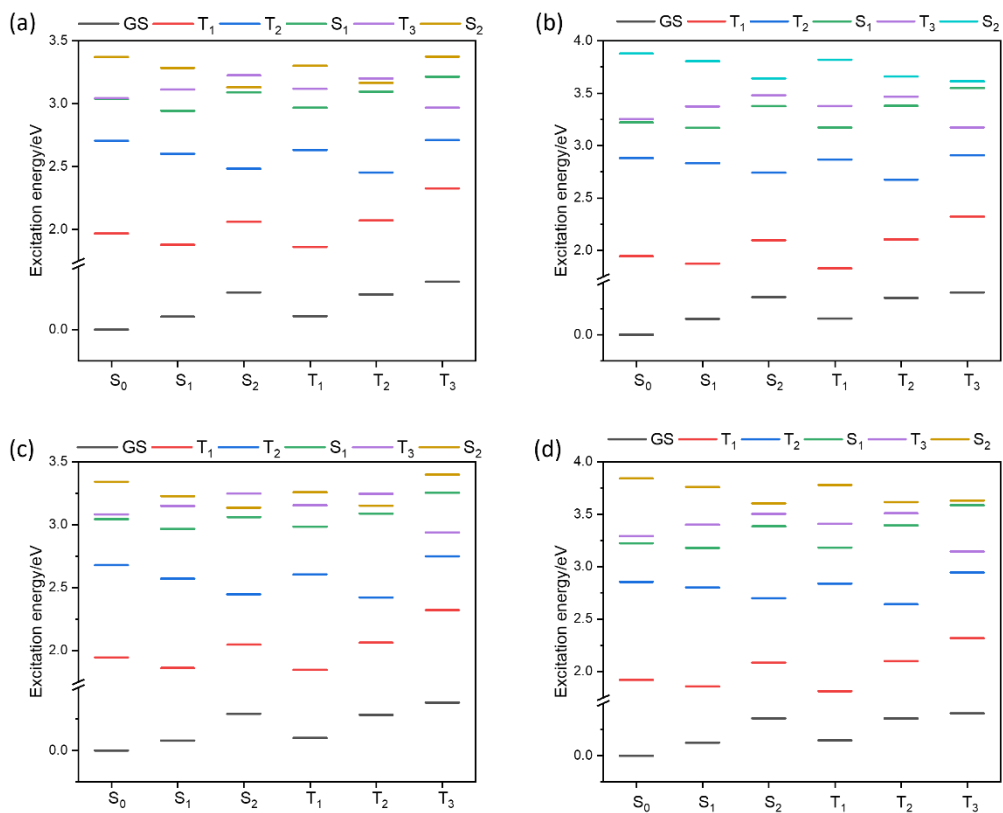

Figure S12. Vertical excitation energy of 8AmFL in DCM (a,b) and water(c,d) calculated with B3LYP(a,c) and CAM-B3LYP (b,d) functional at S<sub>0</sub>, S<sub>1</sub>, S<sub>2</sub>, T<sub>1</sub>, T<sub>2</sub> and T<sub>3</sub> minimum geometry obtained at B3LYP/6-311g(d) level of theory.

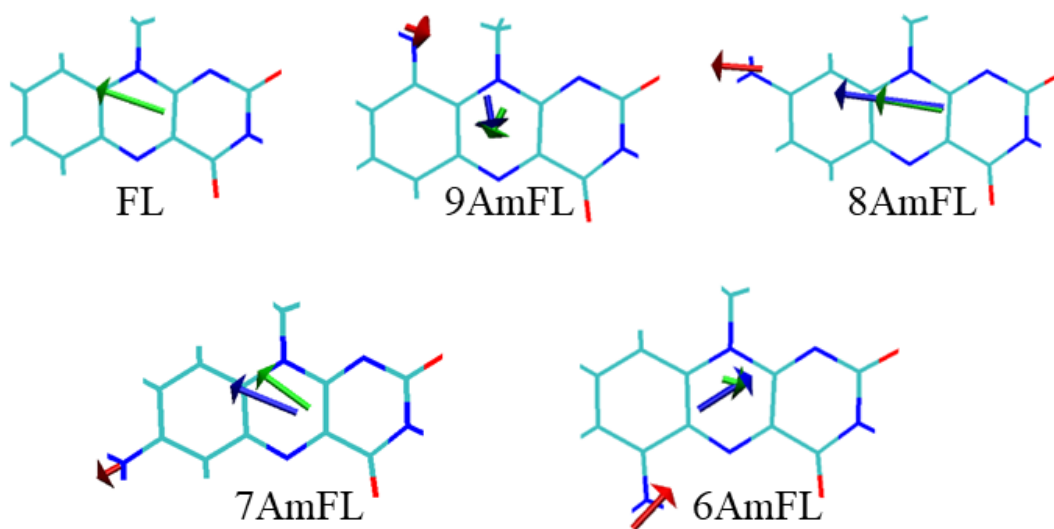

Figure S13. Contribution of  $-NH_2$  (red) and isoalloxazine moiety (green) to  $\mu(S_1 \rightarrow S_0)$  of FL, 9AmFL, 8AmFL, 7AmFL and 6AmFL (blue).

Table S13. Contribution of -NH<sub>2</sub> and isoalloxazine moiety to  $\mu(S_1 \rightarrow S_0)$  of FL, 9AmFL, 8AmFL, 7AmFL and 6AmFL.

| Mol   | $ \mu(S_1 \rightarrow S_0) ^a$<br>(a.u.) | Contribution of<br>isoalloxazine to<br>$ \mu(S_1 \rightarrow S_0) $ (a.u.) | Contribution of -<br>NH <sub>2</sub> to $ \mu(S_1 \rightarrow S_0) $<br>(a.u.) |
|-------|------------------------------------------|----------------------------------------------------------------------------|--------------------------------------------------------------------------------|
| FL    | 1.63                                     | 1.63                                                                       | —                                                                              |
| 9AmFL | 0.56                                     | 0.45                                                                       | 0.73                                                                           |
| 8AmFL | 2.72                                     | 1.95                                                                       | 0.78                                                                           |
| 7AmFL | 1.48                                     | 1.29                                                                       | 0.33                                                                           |
| 6AmFL | 0.90                                     | 0.30                                                                       | 0.62                                                                           |

<sup>a</sup> The transition dipole moments were calculated as vectors, they were projected to calculate the contribution of -NH<sub>2</sub> and isoalloxazine moieties. For clearance, only  $|\mu|$  was presented.



Table S14. Projection of HR and  $E_{\text{reorg}}$  of  $S_1 \rightarrow S_0$  transition to  $S_0$  vibrational normal modes of FL.

| $S_0$ Normal Mode | Frequency / $\text{cm}^{-1}$ | HR factor | HR %  | $E_{\text{reorg}}$ / $\text{cm}^{-1}$ | $E_{\text{reorg}}$ % |
|-------------------|------------------------------|-----------|-------|---------------------------------------|----------------------|
| 7                 | 210.42                       | 0.70      | 30.35 | 147.55                                | 7.40                 |
| 13                | 435.64                       | 0.04      | 1.84  | 18.53                                 | 0.93                 |
| 15                | 516.76                       | 0.11      | 4.96  | 59.21                                 | 2.97                 |
| 17                | 548.24                       | 0.12      | 5.15  | 65.17                                 | 3.27                 |
| 20                | 625.54                       | 0.11      | 4.76  | 68.77                                 | 3.45                 |
| 21                | 659.41                       | 0.02      | 1.03  | 15.65                                 | 0.79                 |
| 23                | 729.52                       | 0.03      | 1.12  | 18.84                                 | 0.95                 |
| 28                | 808.55                       | 0.07      | 2.84  | 53.08                                 | 2.66                 |
| 38                | 1128.46                      | 0.04      | 1.78  | 46.42                                 | 2.33                 |
| 39                | 1155.36                      | 0.04      | 1.78  | 47.45                                 | 2.38                 |
| 41                | 1201.15                      | 0.03      | 1.16  | 32.28                                 | 1.62                 |
| 42                | 1223.66                      | 0.03      | 1.35  | 38.07                                 | 1.91                 |
| 43                | 1250.85                      | 0.21      | 8.95  | 258.68                                | 12.98                |
| 46                | 1357.22                      | 0.02      | 0.70  | 22.07                                 | 1.11                 |
| 47                | 1395.03                      | 0.07      | 3.05  | 98.19                                 | 4.93                 |
| 48                | 1407.42                      | 0.12      | 5.40  | 175.46                                | 8.80                 |
| 49                | 1436.02                      | 0.05      | 2.12  | 70.49                                 | 3.54                 |
| 51                | 1470.92                      | 0.02      | 0.89  | 30.15                                 | 1.51                 |
| 54                | 1528.74                      | 0.02      | 1.02  | 36.00                                 | 1.81                 |
| 57                | 1633.95                      | 0.14      | 6.22  | 234.74                                | 11.78                |
| 58                | 1673.12                      | 0.09      | 4.08  | 157.76                                | 7.92                 |
| 59                | 1701.61                      | 0.11      | 4.89  | 192.18                                | 9.64                 |
| 60                | 1786.49                      | 0.02      | 0.83  | 34.40                                 | 1.73                 |

Note: Total  $E_{\text{reorg}}$  is  $1993 \text{ cm}^{-1}$  and total HR is 2.31.

Table S15. Projection of HR and  $E_{\text{reorg}}$  of  $S_1 \rightarrow S_0$  transition to  $S_0$  vibrational normal modes of 6AmFL.

| $S_0$ Normal Mode | Frequency / $\text{cm}^{-1}$ | HR factor | HR %  | $E_{\text{reorg}} / \text{cm}^{-1}$ | $E_{\text{reorg}} \%$ |
|-------------------|------------------------------|-----------|-------|-------------------------------------|-----------------------|
| 7                 | 182.35                       | 0.15      | 5.75  | 27.64                               | 1.28                  |
| 10                | 303.60                       | 0.10      | 3.75  | 29.95                               | 1.39                  |
| 12                | 344.30                       | 0.08      | 2.90  | 26.30                               | 1.22                  |
| 15                | 426.68                       | 0.26      | 9.97  | 112.09                              | 5.21                  |
| 16                | 440.22                       | 0.04      | 1.43  | 16.63                               | 0.77                  |
| 20                | 545.86                       | 0.49      | 18.55 | 266.66                              | 12.39                 |
| 21                | 550.15                       | 0.47      | 17.88 | 259.04                              | 12.04                 |
| 24                | 642.89                       | 0.12      | 4.50  | 76.13                               | 3.54                  |
| 27                | 728.95                       | 0.03      | 1.25  | 23.91                               | 1.11                  |
| 30                | 780.87                       | 0.04      | 1.46  | 30.02                               | 1.40                  |
| 41                | 1092.33                      | 0.06      | 2.13  | 61.38                               | 2.85                  |
| 45                | 1220.55                      | 0.08      | 2.94  | 94.53                               | 4.39                  |
| 46                | 1233.83                      | 0.02      | 0.69  | 22.53                               | 1.05                  |
| 48                | 1316.77                      | 0.05      | 1.75  | 60.68                               | 2.82                  |
| 49                | 1348.82                      | 0.03      | 1.17  | 41.53                               | 1.93                  |
| 50                | 1380.90                      | 0.02      | 0.65  | 23.51                               | 1.09                  |
| 59                | 1555.87                      | 0.02      | 0.92  | 37.74                               | 1.75                  |
| 60                | 1586.77                      | 0.04      | 1.67  | 69.90                               | 3.25                  |
| 61                | 1626.88                      | 0.13      | 5.08  | 217.69                              | 10.12                 |
| 63                | 1669.04                      | 0.10      | 3.74  | 164.55                              | 7.65                  |
| 64                | 1688.46                      | 0.22      | 8.39  | 373.23                              | 17.35                 |

Note: Total  $E_{\text{reorg}}$  is  $2152 \text{ cm}^{-1}$  and total HR is 2.63.

Table S16. Projection of HR and  $E_{\text{reorg}}$  of  $S_1 \rightarrow S_0$  transition to  $S_0$  vibrational normal modes of 7AmFL.

| $S_0$ Normal Mode | Frequency / $\text{cm}^{-1}$ | HR factor | HR %  | $E_{\text{reorg}} / \text{cm}^{-1}$ | $E_{\text{reorg}} \%$ |
|-------------------|------------------------------|-----------|-------|-------------------------------------|-----------------------|
| 6                 | 179.22                       | 0.47      | 11.04 | 84.79                               | 2.33                  |
| 10                | 300.03                       | 0.18      | 4.16  | 53.46                               | 1.47                  |
| 13                | 355.88                       | 0.12      | 2.89  | 44.09                               | 1.21                  |
| 15                | 415.04                       | 0.11      | 2.59  | 46.03                               | 1.26                  |
| 18                | 509.58                       | 0.31      | 7.16  | 156.35                              | 4.30                  |
| 20                | 526.46                       | 0.56      | 13.12 | 295.93                              | 8.13                  |
| 21                | 536.59                       | 0.88      | 20.51 | 471.72                              | 12.96                 |
| 23                | 623.89                       | 0.12      | 2.85  | 76.19                               | 2.09                  |
| 25                | 660.86                       | 0.06      | 1.42  | 40.27                               | 1.11                  |
| 31                | 804.35                       | 0.06      | 1.41  | 48.57                               | 1.33                  |
| 42                | 1135.25                      | 0.05      | 1.14  | 55.53                               | 1.53                  |
| 44                | 1196.39                      | 0.03      | 0.79  | 40.45                               | 1.11                  |
| 45                | 1210.34                      | 0.05      | 1.14  | 59.18                               | 1.63                  |
| 46                | 1240.02                      | 0.04      | 1.01  | 53.77                               | 1.48                  |
| 47                | 1281.52                      | 0.08      | 1.91  | 104.66                              | 2.88                  |
| 50                | 1366.53                      | 0.06      | 1.38  | 80.75                               | 2.22                  |
| 51                | 1398.59                      | 0.14      | 3.21  | 192.22                              | 5.28                  |
| 58                | 1532.08                      | 0.03      | 0.75  | 48.95                               | 1.34                  |
| 60                | 1592.34                      | 0.04      | 0.91  | 62.41                               | 1.71                  |
| 61                | 1631.64                      | 0.02      | 0.54  | 37.51                               | 1.03                  |
| 62                | 1681.75                      | 0.15      | 3.40  | 245.11                              | 6.73                  |
| 63                | 1698.01                      | 0.14      | 3.19  | 232.45                              | 6.39                  |

Note: Total  $E_{\text{reorg}}$  is  $3640 \text{ cm}^{-1}$  and total HR is 4.29.

Table S17. Projection of HR and  $E_{\text{reorg}}$  of  $S_1 \rightarrow S_0$  transition to  $S_0$  vibrational normal modes of 8AmFL.

| $S_0$ Normal Mode | Frequency / $\text{cm}^{-1}$ | HR factor | HR %  | $E_{\text{reorg}} / \text{cm}^{-1}$ | $E_{\text{reorg}} \%$ |
|-------------------|------------------------------|-----------|-------|-------------------------------------|-----------------------|
| 7                 | 185.55                       | 0.08      | 8.01  | 14.96                               | 1.67                  |
| 14                | 388.10                       | 0.05      | 4.91  | 19.18                               | 2.15                  |
| 19                | 509.51                       | 0.06      | 6.26  | 32.07                               | 3.59                  |
| 21                | 534.59                       | 0.20      | 19.58 | 105.33                              | 11.78                 |
| 23                | 608.52                       | 0.06      | 5.97  | 36.53                               | 4.09                  |
| 25                | 667.93                       | 0.01      | 1.02  | 6.85                                | 0.77                  |
| 30                | 793.53                       | 0.02      | 2.10  | 16.75                               | 1.87                  |
| 34                | 857.46                       | 0.07      | 6.82  | 58.84                               | 6.58                  |
| 37                | 969.21                       | 0.01      | 0.98  | 9.57                                | 1.07                  |
| 42                | 1120.68                      | 0.03      | 2.74  | 30.93                               | 3.46                  |
| 45                | 1234.80                      | 0.01      | 0.82  | 10.23                               | 1.14                  |
| 46                | 1241.72                      | 0.02      | 2.00  | 24.99                               | 2.80                  |
| 47                | 1300.22                      | 0.03      | 3.01  | 39.37                               | 4.40                  |
| 49                | 1341.26                      | 0.01      | 1.44  | 19.48                               | 2.18                  |
| 50                | 1379.24                      | 0.02      | 2.08  | 28.88                               | 3.23                  |
| 51                | 1403.35                      | 0.08      | 7.86  | 111.00                              | 12.42                 |
| 55                | 1488.54                      | 0.01      | 0.69  | 10.34                               | 1.16                  |
| 59                | 1571.06                      | 0.02      | 2.19  | 34.57                               | 3.87                  |
| 60                | 1589.86                      | 0.07      | 6.55  | 104.82                              | 11.73                 |
| 62                | 1626.58                      | 0.05      | 4.57  | 74.81                               | 8.37                  |
| 64                | 1710.35                      | 0.02      | 2.15  | 36.92                               | 4.13                  |

Note: Total  $E_{\text{reorg}}$  is  $893 \text{ cm}^{-1}$  and total HR is 1.01.

Table S18. Projection of HR and  $E_{\text{reorg}}$  of  $S_1 \rightarrow S_0$  transition to  $S_0$  vibrational normal modes of 9AmFL.

| $S_0$ Normal Mode | Frequency / $\text{cm}^{-1}$ | HR factor | HR %  | $E_{\text{reorg}} / \text{cm}^{-1}$ | $E_{\text{reorg}} \%$ |
|-------------------|------------------------------|-----------|-------|-------------------------------------|-----------------------|
| 2                 | 70.13                        | 2.49      | 28.10 | 174.81                              | 3.70                  |
| 3                 | 119.04                       | 0.56      | 6.26  | 66.10                               | 1.40                  |
| 6                 | 185.64                       | 0.33      | 3.74  | 61.62                               | 1.30                  |
| 7                 | 201.57                       | 0.35      | 3.98  | 71.11                               | 1.50                  |
| 9                 | 282.89                       | 0.09      | 1.06  | 26.48                               | 0.56                  |
| 10                | 304.76                       | 0.09      | 1.04  | 28.03                               | 0.59                  |
| 13                | 378.36                       | 0.24      | 2.67  | 89.68                               | 1.90                  |
| 14                | 394.81                       | 0.19      | 2.11  | 73.93                               | 1.56                  |
| 18                | 511.04                       | 0.16      | 1.81  | 82.04                               | 1.73                  |
| 21                | 566.72                       | 0.22      | 2.52  | 126.55                              | 2.68                  |
| 22                | 597.79                       | 0.14      | 1.61  | 85.33                               | 1.80                  |
| 23                | 609.30                       | 0.40      | 4.46  | 241.20                              | 5.10                  |
| 24                | 629.63                       | 0.23      | 2.58  | 144.12                              | 3.05                  |
| 25                | 671.90                       | 0.08      | 0.88  | 52.38                               | 1.11                  |
| 26                | 712.50                       | 1.09      | 12.30 | 777.70                              | 16.44                 |
| 28                | 741.24                       | 0.17      | 1.92  | 126.29                              | 2.67                  |
| 29                | 754.42                       | 0.25      | 2.82  | 188.46                              | 3.98                  |
| 30                | 767.91                       | 0.12      | 1.32  | 90.14                               | 1.91                  |
| 35                | 879.93                       | 0.05      | 0.62  | 48.38                               | 1.02                  |
| 42                | 1132.64                      | 0.06      | 0.70  | 70.02                               | 1.48                  |
| 45                | 1207.55                      | 0.04      | 0.47  | 50.22                               | 1.06                  |
| 46                | 1247.07                      | 0.13      | 1.45  | 160.97                              | 3.40                  |
| 50                | 1351.72                      | 0.09      | 0.98  | 117.13                              | 2.48                  |
| 51                | 1387.38                      | 0.16      | 1.81  | 222.78                              | 4.71                  |
| 52                | 1411.16                      | 0.09      | 0.98  | 123.25                              | 2.61                  |
| 59                | 1548.92                      | 0.06      | 0.67  | 92.14                               | 1.95                  |
| 62                | 1670.63                      | 0.21      | 2.35  | 347.65                              | 7.35                  |
| 63                | 1696.17                      | 0.38      | 4.23  | 637.07                              | 13.47                 |

Note: Total  $E_{\text{reorg}}$  is  $4730 \text{ cm}^{-1}$  and total HR is 8.87.

Table S19. Calculated rate constants for IC among energy allowed transitions among  $T_n$  of AmFLs ( $s^{-1}$ ).

| 298 K | $T_3 \rightarrow T_2$ $k_{IC}^a$ | $T_2 \rightarrow T_1$ $k_{IC}^b$ | $T_3 \rightarrow T_1$ $k_{IC}^c$ |
|-------|----------------------------------|----------------------------------|----------------------------------|
| FL    | $3.69 \times 10^{12}$            | $7.68 \times 10^{12}$            | $8.10 \times 10^{11}$            |
| 6AmFL | —                                | $4.94 \times 10^{12}$            | —                                |
| 7AmFL | —                                | $4.08 \times 10^{12}$            | —                                |
| 8AmFL | $6.46 \times 10^{11}$            | $4.63 \times 10^{12}$            | $1.62 \times 10^{12}$            |
| 9AmFL | —                                | $2.64 \times 10^{12}$            | —                                |

<sup>a</sup> Rate constants for  $T_3 \rightarrow T_2$  IC; <sup>b</sup> Rate constants for  $T_2 \rightarrow T_1$  IC; <sup>c</sup> Rate constants for  $T_3 \rightarrow T_1$  IC.

Table S20. Calculated rate constants for radiative and nonradiative  $T_n \rightarrow S_0$  transitions of AmFL derivatives ( $s^{-1}$ )

| 298 K | $T_1-S_0$<br>$k'_{ISC}{}^a$ | $T_1-S_0$ $k_p{}^b$   | $T_2-S_0$<br>$k'_{ISC}{}^c$ | $T_2-S_0$ $k_p{}^d$   | $T_3-S_0$<br>$k'_{ISC}{}^e$ | $T_3-S_0$ $k_p{}^f$   |
|-------|-----------------------------|-----------------------|-----------------------------|-----------------------|-----------------------------|-----------------------|
| FL    | $1.60 \times 10^6$          | $1.30 \times 10^{-2}$ | $4.16 \times 10^4$          | $8.44 \times 10^{-2}$ | $3.23 \times 10^4$          | $4.29 \times 10^{-1}$ |
| 6AmFL | $6.66 \times 10^2$          | $8.35 \times 10^{-3}$ | $1.01 \times 10^5$          | $3.62 \times 10^{-2}$ | —                           | —                     |
| 7AmFL | $7.17 \times 10^4$          | $5.10 \times 10^{-3}$ | $2.12 \times 10^5$          | $1.62 \times 10^{-2}$ | —                           | —                     |
| 8AmFL | $7.43 \times 10^2$          | $3.71 \times 10^{-2}$ | $4.03 \times 10^6$          | $6.42 \times 10^{-2}$ | $6.94 \times 10^6$          | $1.10 \times 10^{-1}$ |
| 9AmFL | $6.69 \times 10^5$          | $4.91 \times 10^{-3}$ | $1.14 \times 10^6$          | $2.18 \times 10^{-2}$ | —                           | —                     |

<sup>a</sup> Nonradiative decay rate constants for the  $T_1 \rightarrow S_0$  transition; <sup>b</sup> Radiative decay rate constants for the  $T_1 \rightarrow S_0$  transition; <sup>c</sup> Nonradiative decay rate constants for the  $T_2 \rightarrow S_0$  transition; <sup>d</sup> Radiative decay rate constants for the  $T_2 \rightarrow S_0$  transition; <sup>e</sup> Nonradiative decay rate constants for the  $T_3 \rightarrow S_0$  transition; <sup>f</sup> Radiative decay rate constants for the  $T_3 \rightarrow S_0$  transition.

Table S21. Projection of HR and  $E_{\text{reorg}}$  of  $T_1 \rightarrow S_0$  transition to  $S_0$  vibrational normal modes of FL.

| $S_0$ Normal Mode | Frequency / $\text{cm}^{-1}$ | HR factor | HR %  | $E_{\text{reorg}}$ / $\text{cm}^{-1}$ | $E_{\text{reorg}}$ % |
|-------------------|------------------------------|-----------|-------|---------------------------------------|----------------------|
| 2                 | 86.07                        | 0.14      | 4.05  | 12.23                                 | 0.30                 |
| 12                | 391.10                       | 0.16      | 4.65  | 63.91                                 | 1.54                 |
| 13                | 435.64                       | 0.05      | 1.36  | 20.76                                 | 0.50                 |
| 15                | 516.76                       | 0.62      | 17.62 | 319.73                                | 7.72                 |
| 28                | 808.55                       | 0.16      | 4.49  | 127.35                                | 3.08                 |
| 30                | 864.69                       | 0.07      | 2.10  | 63.66                                 | 1.54                 |
| 39                | 1155.36                      | 0.06      | 1.59  | 64.68                                 | 1.56                 |
| 43                | 1250.85                      | 0.10      | 2.97  | 130.34                                | 3.15                 |
| 44                | 1320.34                      | 0.05      | 1.53  | 70.89                                 | 1.71                 |
| 47                | 1395.03                      | 0.06      | 1.82  | 88.99                                 | 2.15                 |
| 48                | 1407.42                      | 0.06      | 1.71  | 84.58                                 | 2.04                 |
| 49                | 1436.02                      | 0.04      | 1.03  | 51.78                                 | 1.25                 |
| 52                | 1507.97                      | 0.03      | 0.82  | 43.56                                 | 1.05                 |
| 54                | 1528.74                      | 0.06      | 1.70  | 91.49                                 | 2.21                 |
| 56                | 1600.14                      | 0.22      | 6.31  | 354.34                                | 8.56                 |
| 57                | 1633.95                      | 0.72      | 20.56 | 1179.44                               | 28.48                |
| 58                | 1673.12                      | 0.64      | 18.21 | 1069.74                               | 25.83                |
| 60                | 1786.49                      | 0.05      | 1.43  | 89.51                                 | 2.16                 |

Note: Total  $E_{\text{reorg}}$  is  $4141 \text{ cm}^{-1}$  and total HR is 3.51.



Table S22. Projection of HR and  $E_{\text{reorg}}$  of  $T_1 \rightarrow S_0$  transition to  $S_0$  vibrational normal modes of 6AmFL.

| $S_0$ Normal Mode | Frequency / $\text{cm}^{-1}$ | HR factor | HR %  | $E_{\text{reorg}}$ / $\text{cm}^{-1}$ | $E_{\text{reorg}}$ % |
|-------------------|------------------------------|-----------|-------|---------------------------------------|----------------------|
| 7                 | 182.35                       | 0.10      | 3.25  | 18.81                                 | 0.64                 |
| 14                | 362.09                       | 0.06      | 1.97  | 22.60                                 | 0.77                 |
| 15                | 426.68                       | 0.26      | 8.25  | 111.79                                | 3.79                 |
| 18                | 521.93                       | 0.05      | 1.69  | 28.02                                 | 0.95                 |
| 20                | 545.86                       | 0.36      | 11.30 | 195.84                                | 6.64                 |
| 21                | 550.15                       | 0.82      | 25.90 | 452.42                                | 15.34                |
| 30                | 780.87                       | 0.08      | 2.54  | 63.07                                 | 2.14                 |
| 34                | 861.52                       | 0.04      | 1.18  | 32.37                                 | 1.10                 |
| 44                | 1198.61                      | 0.06      | 1.74  | 66.16                                 | 2.24                 |
| 46                | 1233.83                      | 0.06      | 1.83  | 71.53                                 | 2.42                 |
| 48                | 1316.77                      | 0.16      | 4.93  | 206.26                                | 6.99                 |
| 50                | 1380.90                      | 0.03      | 1.09  | 47.88                                 | 1.62                 |
| 51                | 1389.00                      | 0.06      | 1.91  | 84.12                                 | 2.85                 |
| 56                | 1505.25                      | 0.04      | 1.22  | 58.33                                 | 1.98                 |
| 59                | 1555.87                      | 0.03      | 1.00  | 49.17                                 | 1.67                 |
| 60                | 1586.77                      | 0.26      | 8.34  | 420.05                                | 14.24                |
| 61                | 1626.88                      | 0.46      | 14.60 | 754.13                                | 25.56                |
| 63                | 1669.04                      | 0.06      | 1.86  | 98.58                                 | 3.34                 |

Note: Total  $E_{\text{reorg}}$  is  $2950 \text{ cm}^{-1}$  and total HR is 3.18

Table S23. Projection of HR and  $E_{\text{reorg}}$  of  $T_1 \rightarrow S_0$  transition to  $S_0$  vibrational normal modes of 7AmFL.

| $S_0$ Normal Mode | Frequency / $\text{cm}^{-1}$ | HR factor | HR %  | $E_{\text{reorg}}$ / $\text{cm}^{-1}$ | $E_{\text{reorg}}$ % |
|-------------------|------------------------------|-----------|-------|---------------------------------------|----------------------|
| 6                 | 179.22                       | 0.58      | 12.04 | 104.73                                | 2.50                 |
| 10                | 300.03                       | 0.16      | 3.30  | 48.08                                 | 1.15                 |
| 13                | 355.88                       | 0.14      | 2.95  | 50.98                                 | 1.22                 |
| 15                | 415.04                       | 0.09      | 1.95  | 39.34                                 | 0.94                 |
| 18                | 509.58                       | 0.35      | 7.26  | 179.56                                | 4.29                 |
| 20                | 526.46                       | 0.64      | 13.13 | 335.53                                | 8.02                 |
| 21                | 536.59                       | 0.85      | 17.45 | 454.32                                | 10.86                |
| 23                | 623.89                       | 0.17      | 3.58  | 108.52                                | 2.59                 |
| 31                | 804.35                       | 0.09      | 1.93  | 75.31                                 | 1.80                 |
| 41                | 1122.51                      | 0.04      | 0.81  | 44.26                                 | 1.06                 |
| 42                | 1135.25                      | 0.07      | 1.45  | 79.90                                 | 1.91                 |
| 45                | 1210.34                      | 0.06      | 1.33  | 78.01                                 | 1.87                 |
| 47                | 1281.52                      | 0.09      | 1.89  | 117.84                                | 2.82                 |
| 50                | 1366.53                      | 0.10      | 2.12  | 140.61                                | 3.36                 |
| 51                | 1398.59                      | 0.27      | 5.59  | 379.10                                | 9.06                 |
| 53                | 1437.88                      | 0.03      | 0.66  | 46.19                                 | 1.10                 |
| 58                | 1532.08                      | 0.05      | 1.11  | 82.33                                 | 1.97                 |
| 60                | 1592.34                      | 0.07      | 1.48  | 114.15                                | 2.73                 |
| 61                | 1631.64                      | 0.03      | 0.53  | 42.14                                 | 1.01                 |
| 62                | 1681.75                      | 0.13      | 2.64  | 215.61                                | 5.16                 |
| 63                | 1698.01                      | 0.18      | 3.66  | 301.50                                | 7.21                 |
| 73                | 3607.74                      | 0.21      | 4.33  | 758.25                                | 18.13                |
| 75                | 3701.89                      | 0.01      | 0.31  | 55.51                                 | 1.33                 |

Note: Total  $E_{\text{reorg}}$  is  $4182 \text{ cm}^{-1}$  and total HR is 4.85.

Table S24. Projection of HR and  $E_{\text{reorg}}$  of  $T_1 \rightarrow S_0$  transition to  $S_0$  vibrational normal modes of 8AmFL.

| $S_0$ Normal Mode | Frequency / $\text{cm}^{-1}$ | HR factor | HR %  | $E_{\text{reorg}} / \text{cm}^{-1}$ | $E_{\text{reorg}} \%$ |
|-------------------|------------------------------|-----------|-------|-------------------------------------|-----------------------|
| 7                 | 185.55                       | 0.08      | 4.85  | 15.63                               | 0.93                  |
| 14                | 388.10                       | 0.15      | 8.73  | 58.87                               | 3.51                  |
| 16                | 440.93                       | 0.02      | 1.19  | 9.08                                | 0.54                  |
| 19                | 509.51                       | 0.08      | 4.80  | 42.51                               | 2.53                  |
| 21                | 534.59                       | 0.30      | 17.50 | 162.55                              | 9.68                  |
| 22                | 563.00                       | 0.04      | 2.02  | 19.79                               | 1.18                  |
| 23                | 608.52                       | 0.04      | 2.56  | 27.05                               | 1.61                  |
| 30                | 793.53                       | 0.03      | 1.97  | 27.11                               | 1.61                  |
| 34                | 857.46                       | 0.13      | 7.75  | 115.38                              | 6.87                  |
| 42                | 1120.68                      | 0.02      | 1.06  | 20.56                               | 1.22                  |
| 46                | 1241.72                      | 0.04      | 2.04  | 43.94                               | 2.62                  |
| 47                | 1300.22                      | 0.03      | 1.70  | 38.40                               | 2.29                  |
| 49                | 1341.26                      | 0.02      | 0.89  | 20.71                               | 1.23                  |
| 51                | 1403.35                      | 0.11      | 6.30  | 153.66                              | 9.15                  |
| 56                | 1510.19                      | 0.02      | 1.15  | 30.09                               | 1.79                  |
| 57                | 1524.24                      | 0.09      | 4.97  | 131.71                              | 7.84                  |
| 59                | 1571.06                      | 0.05      | 3.00  | 81.97                               | 4.88                  |
| 60                | 1589.86                      | 0.20      | 11.55 | 318.88                              | 18.99                 |
| 61                | 1602.26                      | 0.07      | 3.80  | 105.74                              | 6.30                  |
| 62                | 1626.58                      | 0.08      | 4.66  | 131.74                              | 7.85                  |
| 65                | 1774.78                      | 0.01      | 0.64  | 19.80                               | 1.18                  |

Note: Total  $E_{\text{reorg}}$  is  $1679 \text{ cm}^{-1}$  and total HR is 1.74.

Table S25. Projection of HR and  $E_{\text{reorg}}$  of  $T_1 \rightarrow S_0$  transition to  $S_0$  vibrational normal modes of 9AmFL.

| $S_0$ Normal Mode | Frequency / $\text{cm}^{-1}$ | HR factor | HR %  | $E_{\text{reorg}}$ / $\text{cm}^{-1}$ | $E_{\text{reorg}}$ % |
|-------------------|------------------------------|-----------|-------|---------------------------------------|----------------------|
| 2                 | 70.13                        | 1.30      | 15.64 | 91.13                                 | 1.67                 |
| 3                 | 119.04                       | 0.33      | 3.94  | 38.98                                 | 0.71                 |
| 6                 | 185.64                       | 0.40      | 4.78  | 73.65                                 | 1.35                 |
| 7                 | 201.57                       | 0.30      | 3.65  | 61.11                                 | 1.12                 |
| 10                | 304.76                       | 0.19      | 2.27  | 57.35                                 | 1.05                 |
| 13                | 378.36                       | 0.36      | 4.33  | 135.99                                | 2.49                 |
| 14                | 394.81                       | 0.23      | 2.78  | 91.34                                 | 1.67                 |
| 18                | 511.04                       | 0.17      | 2.06  | 87.28                                 | 1.60                 |
| 19                | 532.60                       | 0.09      | 1.12  | 49.38                                 | 0.90                 |
| 21                | 566.72                       | 0.18      | 2.14  | 100.83                                | 1.85                 |
| 22                | 597.79                       | 0.09      | 1.07  | 52.97                                 | 0.97                 |
| 23                | 609.30                       | 0.39      | 4.68  | 236.73                                | 4.34                 |
| 24                | 629.63                       | 0.15      | 1.86  | 97.52                                 | 1.79                 |
| 25                | 671.90                       | 0.10      | 1.15  | 64.22                                 | 1.18                 |
| 26                | 712.50                       | 1.14      | 13.70 | 810.84                                | 14.86                |
| 28                | 741.24                       | 0.18      | 2.15  | 132.38                                | 2.43                 |
| 29                | 754.42                       | 0.31      | 3.73  | 233.83                                | 4.28                 |
| 30                | 767.91                       | 0.12      | 1.41  | 90.19                                 | 1.65                 |
| 35                | 879.93                       | 0.09      | 1.05  | 76.85                                 | 1.41                 |
| 41                | 1108.69                      | 0.06      | 0.68  | 62.98                                 | 1.15                 |
| 42                | 1132.64                      | 0.11      | 1.30  | 122.73                                | 2.25                 |
| 46                | 1247.07                      | 0.15      | 1.81  | 187.83                                | 3.44                 |
| 50                | 1351.72                      | 0.13      | 1.61  | 180.79                                | 3.31                 |
| 51                | 1387.38                      | 0.30      | 3.61  | 416.41                                | 7.63                 |
| 52                | 1411.16                      | 0.11      | 1.33  | 155.80                                | 2.85                 |
| 59                | 1548.92                      | 0.07      | 0.80  | 102.53                                | 1.88                 |
| 62                | 1670.63                      | 0.36      | 4.31  | 598.27                                | 10.96                |
| 63                | 1696.17                      | 0.33      | 4.00  | 563.45                                | 10.32                |

Note: Total  $E_{\text{reorg}}$  is  $5458 \text{ cm}^{-1}$  and total HR is 8.31.

Table S26. Concentration of AmFLs at steady state under irradiation (mol/L)

| Mol (298 K) | c(S <sub>0</sub> )    | c(S <sub>1</sub> )    | c(T <sub>1</sub> )    | c(T <sub>2</sub> )     | c(T <sub>3</sub> )     |
|-------------|-----------------------|-----------------------|-----------------------|------------------------|------------------------|
| FL          | $3.29 \times 10^{-2}$ | $4.43 \times 10^{-8}$ | $7.65 \times 10^{-5}$ | $1.31 \times 10^{-11}$ | $2.71 \times 10^{-11}$ |
| 8AmFL       | $3.01 \times 10^{-3}$ | $8.40 \times 10^{-8}$ | $3.00 \times 10^{-2}$ | $2.50 \times 10^{-12}$ | $1.64 \times 10^{-11}$ |

## References:

1. R. C. Binning and L. A. Curtiss, *J. Comput. Chem.*, 1990, **11**, 1206-1216.
2. M. M. Francl, W. J. Pietro, W. J. Hehre, J. S. Binkley, M. S. Gordon, D. J. Defrees and J. A. Pople, *J. Chem. Phys.*, 1982, **77**, 3654-3665.
3. A. D. Becke, *J. Chem. Phys.*, 1993, **98**, 5648-5652.
4. C. T. Lee, W. T. Yang and R. G. Parr, *Phys. Rev. B*, 1988, **37**, 785-789.
5. S. Miertus, E. Scrocco and J. Tomasi, *Chem. Phys.*, 1981, **55**, 117-129.
6. R. Cammi and B. Mennucci, *J. Chem. Phys.*, 1999, **110**, 9877-9886.
7. J. Tomasi, B. Mennucci and R. Cammi, *Chem. Rev.*, 2005, **105**, 2999-3093.
8. M. J. Frisch, G. W. Trucks, H. B. Schlegel, G. E. Scuseria, M. A. Robb, J. R. Cheeseman, G. Scalmani, V. Barone, G. A. Petersson, H. Nakatsuji, X. Li, M. Caricato, A. V. Marenich, J. Bloino, B. G. Janesko, R. Gomperts, B. Mennucci, H. P. Hratchian, J. V. Ortiz, A. F. Izmaylov, J. L. Sonnenberg, Williams, F. Ding, F. Lipparini, F. Egidi, J. Goings, B. Peng, A. Petrone, T. Henderson, D. Ranasinghe, V. G. Zakrzewski, J. Gao, N. Rega, G. Zheng, W. Liang, M. Hada, M. Ehara, K. Toyota, R. Fukuda, J. Hasegawa, M. Ishida, T. Nakajima, Y. Honda, O. Kitao, H. Nakai, T. Vreven, K. Throssell, J. A. Montgomery Jr., J. E. Peralta, F. Ogliaro, M. J. Bearpark, J. J. Heyd, E. N. Brothers, K. N. Kudin, V. N. Staroverov, T. A. Keith, R. Kobayashi, J. Normand, K. Raghavachari, A. P. Rendell, J. C. Burant, S. S. Iyengar, J. Tomasi, M. Cossi, J. M. Millam, M. Klene, C. Adamo, R. Cammi, J. W. Ochterski, R. L. Martin, K. Morokuma, O. Farkas, J. B. Foresman and D. J. Fox, *Journal*, 2016.
9. J. Wang and B. Durbeej, *J. Comput. Chem.*, 2020, **41**, 1718-1729.
10. Y.-K. Choe, S. Nagase and K. Nishimoto, *J. Comput. Chem.*, 2007, **28**, 727-739.
11. R. K. Kar, S. Chasen, M. A. Mroginiski and A. F. Miller, *J. Phys. Chem. B*, 2021, **125**, 12654-12669.
12. B. D. Etz, J. M. DuClos and S. Vyas, *J. Phys. Chem. A*, 2020, **124**, 4193-4201.
13. O. Vahtras, H. Agren, P. Jorgensen, H. J. A. Jensen, T. Helgaker and J. Olsen, *J. Chem. Phys.*, 1992, **97**, 9178-9187.
14. H. Hettema, H. J. A. Jensen, P. Jorgensen and J. Olsen, *J. Chem. Phys.*, 1992, **97**, 1174-1190.
15. H. Agren, O. Vahtras, H. Koch, P. Jorgensen and T. Helgaker, *J. Chem. Phys.*, 1993, **98**, 6417-6423.
16. J. Olsen, D. L. Yeager and P. Jorgensen, *J. Chem. Phys.*, 1989, **91**, 381-388.
17. P. Jorgensen, H. J. A. Jensen and J. Olsen, *J. Chem. Phys.*, 1988, **89**, 3654-3661.
18. K. Aidas, C. Angeli, K. L. Bak, V. Bakken, R. Bast, L. Boman, O. Christiansen, R. Cimiraglia, S. Coriani, P. Dahle, E. K. Dalskov, U. Ekstrom, T. Enevoldsen, J. J. Eriksen, P. Ettenhuber, B. Fernandez, L. Ferrighi, H. Fliegl, L. Frediani, K. Hald, A. Halkier, C. Hattig, H. Heiberg, T. Helgaker, A. C. Hennum, H. Hettema, E. Hjertenaes, S. Host, I. M. Hoyvik, M. F. Iozzi, B. Jansik, H. J. A. Jensen, D. Jonsson, P. Jorgensen, J. Kauczor, S. Kirpekar, T. Kjrgaard, W. Klopper, S. Knecht, R. Kobayashi, H. Koch, J. Kongsted, A. Krapp, K. Kristensen, A. Ligabue, O. B. Lutnaes, J. I. Melo, K. V. Mikkelsen, R. H. Myhre, C. Neiss, C. B. Nielsen, P. Norman, J. Olsen, J. M. H. Olsen, A. Osted, M. J. Packer, F. Pawlowski, T. B. Pedersen, P. F. Provasi, S. Reine, Z. Rinkevicius, T. A. Ruden, K. Ruud, V. V. Rybkin, P. Salek, C. C. M. Samson, A. S. de Meras, T. Saue, S. P. A. Sauer, B. Schimmelpfennig, K. Snegov, A. H. Steindal, K. O. Sylvester-Hvid, P. R. Taylor, A. M. Teale, E. I. Tellgren, D. P. Tew, A. J. Thorvaldsen, L. Thogersen, O. Vahtras, M. A. Watson, D. J. D. Wilson, M. Ziolkowski and H.

- Agren, *Wiley Interdiscip. Rev.-Comput. Mol. Sci.*, 2014, **4**, 269-284.
19. Q. Peng, Y. P. Yi, Z. G. Shuai and J. S. Shao, *J. Chem. Phys.*, 2007, **126**, 114302.
  20. Q. Peng, Y. P. Yi, Z. G. Shuai and J. S. Shao, *J. Am. Chem. Soc.*, 2007, **129**, 9333-9339.
  21. Y. L. Niu, Q. A. Peng, C. M. Deng, X. Gao and Z. G. Shuai, *J. Phys. Chem. A*, 2010, **114**, 7817-7831.
  22. Y. Niu, Q. Peng and Z. Shuai, *Sci. China Ser. B-Chem.*, 2008, **51**, 1153-1158.
  23. Q. Peng, Y. L. Niu, Q. H. Shi, X. Gao and Z. G. Shuai, *J. Chem. Theory Comput.*, 2013, **9**, 1132-1143.
  24. Z. G. Shuai, *Chin. J. Chem.*, 2020, **38**, 1223-1232.
  25. Y. L. Niu, W. Q. Li, Q. Peng, H. Geng, Y. P. Yi, L. J. Wang, G. J. Nan, D. Wang and Z. G. Shuai, *Mol. Phys.*, 2018, **116**, 1078-1090.
  26. Z. G. Shuai and Q. Peng, *Phys. Rep.-Rev. Sec. Phys. Lett.*, 2014, **537**, 123-156.
  27. Z. G. Shuai and Q. Peng, *Natl. Sci. Rev.*, 2017, **4**, 224-239.
  28. Y. Niu, Q. Peng, C. Deng, X. Gao and Z. Shuai, *J. Phys. Chem. A*, 2010, **114**, 7817-7831.
